# Supplementary material for: Copper-catalyzed asymmetric sp3 C–H arylation of tetrahydroisoquinoline mediated by a visible light photoredox catalyst
Source: PubMed Central journal article supplement (PMC5238558; doi:10.3762/bjoc.12.260), 2016-12-06
Supplement: Beilstein_J_Org_Chem-12-2636-s001.pdf [file Beilstein_J_Org_Chem-12-2636-s001.pdf]

**Supporting Information**

**for**

**Copper-catalyzed asymmetric  $sp^3$  C–H arylation of tetrahydroisoquinoline mediated by a visible light photoredox catalyst**

Pierre Querard<sup>1</sup>, Inna Perepichka<sup>1</sup>, Eli Zysman-Colman<sup>2</sup> and Chao-Jun Li\*<sup>1</sup>

Address: <sup>1</sup>Department of Chemistry, FQRNT Center for Green Chemistry and Catalysis, McGill University, 801 Sherbrooke Street West, Montreal, Quebec H3A 0B8, Canada and <sup>2</sup>Organic Semiconductor Centre, EaStCHEM School of Chemistry, University of St Andrews, St Andrews, Fife, KY16 9ST, UK

Email: Prof. Chao-Jun Li - [cj.li@mcgill.ca](mailto:cj.li@mcgill.ca)

\*Corresponding author

**Experimental and copies of spectra**

## Contents

|                                                                                                                     |     |
|---------------------------------------------------------------------------------------------------------------------|-----|
| <b>1.</b> General information                                                                                       | S3  |
| <b>2.</b> General procedure for the synthesis of 2-phenyl-1,2,3,4-tetrahydroisoquinoline                            | S3  |
| <b>3.</b> Characterization of starting materials                                                                    | S4  |
| <b>4.</b> Synthesis of $[\text{Ir}(\text{ppy})_2(\text{dtbbpy})](\text{PF}_6)$                                      | S5  |
| <b>5.</b> Characterization data and HPLC chromatogram for the racemic and chiral tetrahydroisoquinoline derivatives | S6  |
| <b>6.</b> Effect of conditions on the coupling of 2-phenyl-1,2,3,4-tetrahydroisoquinoline with phenylboronic acid   | S20 |
| <b>7.</b> NMR data for 1,2-diaryl-1,2,3,4-tetrahydroisoquinoline derivatives                                        | S23 |

## 1. General information

Solvents and reagents were purchased from Sigma-Aldrich chemical company and were used without further purification unless otherwise specified. The glassware was oven-dried for at least 1 h prior to use. All reagents were weighed and handled in air, and backfilled under an inert atmosphere of nitrogen at room temperature. 2-Phenyltetrahydroisoquinolines **1** (Scheme 3)<sup>1,2,3</sup> and  $[\text{Ir}(\text{ppy})_2(\text{dtbbpy})]\text{PF}_6$ <sup>4,5</sup> were synthesized according to the published procedures and spectroscopic data were consistent (see text later) with those previously reported for these compounds. <sup>1</sup>H NMR and <sup>13</sup>C NMR spectra were obtained using Varian MERCURY- 400, and 500 MHz and a Bruker AV500 spectrometers operating respectively at 500 MHz and 126 MHz for <sup>1</sup>H and <sup>13</sup>C acquisitions. GC-MS and HRMS (ESI) spectra were conducted at the Mass Spectroscopy Facility at the Department of Chemistry, McGill University on a Thermo PolarisQ GC System and a JEOL JMS-700 instrument, respectively. The enantiomeric excess was determined by HPLC with an Agilent 1260 Infinity Diode Array detector (G 4212B) by using a Chiralcel OD-H column (25 cm × 4.6 mm, particle size 5 μm) and 4:96 isopropanol/hexane as an eluent (flow rate 0.4 mL/min, UV detection at 254 nm). Analytical thin-layer chromatography (TLC) was performed on Merck silica gel aluminium plates with F-254 indicator, visualised by irradiation with UV light.

## 2. General procedure for the synthesis of 2-phenyltetrahydroisoquinoline (**1**)<sup>1</sup>

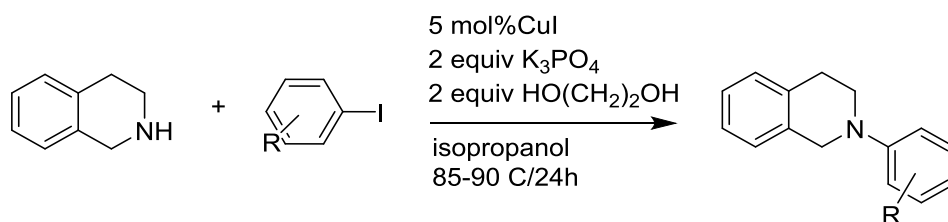

Copper(I) iodide (200 mg, 1.0 mmol) and potassium phosphate (4.25 g, 20.0 mmol) were placed into a 50 mL three-neck flask. The flask was evacuated and back-filled with argon. 2-Propanol (10.0 mL), ethylene glycol (1.11 mL), 1,2,3,4-tetrahydroisoquinoline (2.0 mL, 15 mmol) and iodobenzene (1.12 mL, 10.0 mmol) were added successively by syringe at room temperature. The reaction mixture was heated at 90 °C for 24 h and then allowed to cool to room temperature.

Diethyl ether (20 mL) and water (20 mL) were then added to the reaction mixture. The organic layer was extracted with diethyl ether ( $2 \times 20$  mL). The combined organic phases were washed with brine and dried over sodium sulfate. The solvent was removed and the residue was purified by column chromatography on silica gel using hexane/ethyl acetate (20:1) as an eluent.

### 3. Characterization of starting materials:

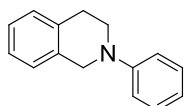

**2-Phenyl-1,2,3,4-tetrahydroisoquinoline**, <sup>1</sup>H NMR (400 MHz, CDCl<sub>3</sub>):

$\delta$  7.32-7.26 (m, 2 H), 7.21-7.15 (m, 4 H), 7.00 (d,  $J$  = 8.0 Hz, 2 H), 6.84 (t,  $J$  = 8.0 Hz, 1 H), 4.42 (s, 2 H), 3.58 (t,  $J$  = 6 Hz, 2 H), 3.00 (t,  $J$  = 5.6 Hz, 2H).

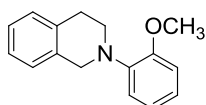

**2-(2-Methoxyphenyl)-1,2,3,4-tetrahydroisoquinoline**, <sup>1</sup>H NMR (300

MHz, CDCl<sub>3</sub>):  $\delta$  7.18-7.11 (m, 4 H), 7.03-7.0 (m, 2 H), 6.94-6.89 (m, 2 H), 4.31 (s, H), 3.89 (s, 3 H), 3.43 (t,  $J$  = 6.0 Hz, 2 H), 2.99 (t,  $J$  = 6.0 Hz, 2H).

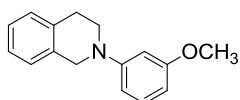

**2-(3-Methoxyphenyl)-1,2,3,4-tetrahydroisoquinoline**, <sup>6</sup> <sup>1</sup>H NMR (400

MHz, CDCl<sub>3</sub>):  $\delta$  7.25-7.15 (m, 4 H), 6.62-6.59 (m, 1 H), 6.53-6.52 (m, 1H), 6.41-6.39 (m, 1 H), 4.42 (s, 2 H), 3.81 (s, 3 H), 3.56 (t,  $J$  = 6.4 Hz, 2 H), 2.99 (t,  $J$  = 5.6 Hz, 2H).

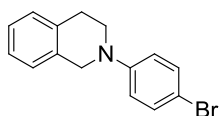

**2-(4-Bromophenyl)-1,2,3,4-tetrahydroisoquinoline**, <sup>2</sup> <sup>1</sup>H NMR (300

MHz, CDCl<sub>3</sub>):  $\delta$  7.37-7.34 (d,  $J$  = 9.0 Hz, 2 H), 7.20-7.15 (m, 4 H), 6.84 (d,  $J$  = 9.0 Hz, 2 H), 4.38 (s, 2 H), 3.54 (t,  $J$  = 6.9 Hz, 2 H), 3.00 (t,  $J$  = 6.0 Hz, 2H).

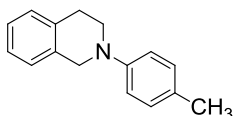

**2-(4-Methylphenyl)-1,2,3,4-tetrahydroisoquinoline (1k)**, <sup>2</sup> <sup>1</sup>H NMR

(500MHz, CDCl<sub>3</sub>): δ 7.18-7.11 (m, 4 H), 7.00 (d, *J* = 5 Hz, 2 H), 6.93 (d, *J* = 5 Hz, 2 H), 4.37 (s, 2 H), 3.52 (t, *J* = 5 Hz, 2 H), 2.99 (t, *J* = 5.5 Hz, 2 H), 2.29 (s, 1H).

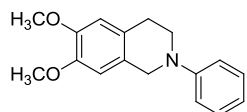

**6,7-Dimethoxy-2-phenyl-1,2,3,4-tetrahydroisoquinoline,<sup>7</sup>**

<sup>1</sup>H NMR (300 MHz, CDCl<sub>3</sub>): δ 7.33-7.25 (m, 2 H), 7.02-6.95 (m, 2 H), 6.87-6.78 (m, 1 H), 6.66, 6.65 (s, 2H), 4.34 (s, 2H), 3.88 (s, 3 H), 3.87 (s, 3H), 3.55 (t, *J* = 5.8 Hz, 2 H), 2.90 (t, *J* = 5.8 Hz, 2H).

**4. Synthesis of [Ir(ppy)<sub>2</sub>(dtbbpy)](PF<sub>6</sub>)<sup>5,6</sup>**

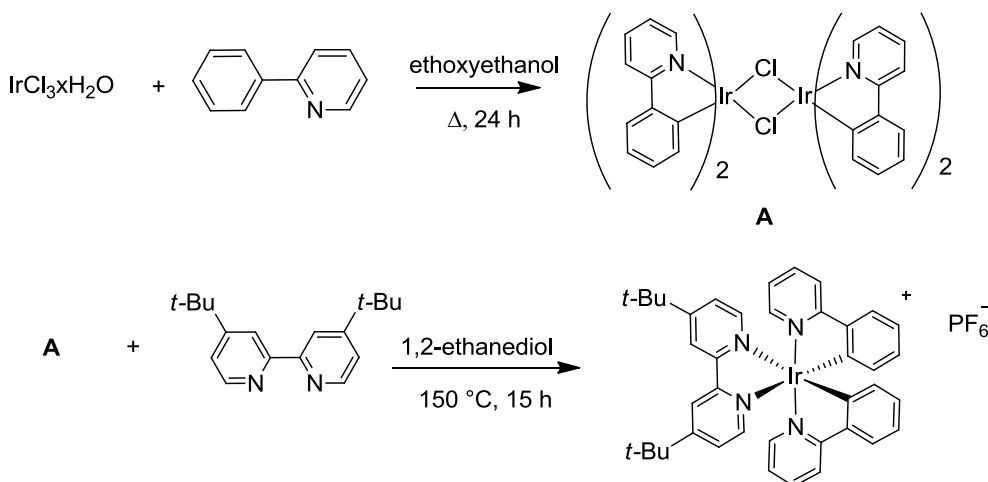

**Scheme 1S: Synthesis of [Ir(ppy)<sub>2</sub>(dtbbpy)](PF<sub>6</sub>).**

**Tetrakis(2-phenylpyridine-C2,N<sup>1</sup>) (μ-dichloro)diiridium, (A, Scheme 1S)** Iridium trichloride hydrate (0.389 g, 1.31 mmol) was combined with 2-phenylpyridine (0.76 g, 4.9 mmol), dissolved in a mixture of 2-ethoxyethanol (30 mL) and water (10 mL), and refluxed for 24 h. The solution was cooled to room temperature, and the yellow precipitate was collected on a glass filter frit. The precipitate was washed with ethanol (60 mL) and acetone (60 mL) and then dissolved in dichloromethane (75 mL) and filtered. Toluene (25 mL) and hexanes (10 mL) were added to the

filtrate, which was then reduced in volume by evaporation to 50 mL, and cooled to give crystals of  $[\text{Ir}(\text{ppy})_2\text{Cl}]_2$  (0.44 g, 75%) (**A**, Scheme 1S).

**Synthesis of  $[\text{Ir}(\text{ppy})_2(\text{dtbbpy})](\text{PF}_6)$**  was adapted from literature procedures<sup>6</sup> for the analogous unsubstituted complex. A stirred suspension of 4,4'-di-*tert*-butyl-2,2'-dipyridyl (0.44 g, 0.88 mmol) and tetrakis(2-phenylpyridine-C,N)( $\mu$ -dichloro)diiridium, **A** (0.428g, 0.400 mmol) in 20 mL of 1,2-ethanediol under nitrogen was heated to 150 °C for 15 h. All the solids dissolved to yield a clear, yellow solution. After cooling the mixture to room temperature, 200 mL of water were added. The excess of the bipyridine ligand was removed through three extractions with diethyl ether (3  $\times$  50 mL), and the aqueous layer was subsequently heated to 70 °C.  $\text{NH}_4\text{PF}_6$  (2 g) in 20 mL of water was added, and the  $\text{PF}_6$  salt of the iridium complex immediately precipitated. After cooling the suspension to 5 °C, the yellow solid was separated through filtration, dried, and recrystallized through acetonitrile/ether. Yield: 0.50 g (66%).  $^1\text{H}$  NMR (acetone- $d_6$ , 400 MHz):  $\delta$  8.88 (d,  $J = 2.0$  Hz, dtb-bpy-H3, 2H), 8.24 (ppy-H6, pyridine, 2H, d,  $J = 8$ ), 7.99-7.93 (m, dtb-bpy-H6, 2H, ppy-H5, pyridine, 2H), 7.90 (ppy-H3, phenyl, 2H, dd,  $J = 7.2, 0.8$  Hz), 7.79 (ppy-H6, phenyl, 2H, d,  $J = 6$  Hz), 7.71 (dtb-bpy-H5, 2H, dd,  $J = 6.0, 2.0$  Hz), 7.14 (ppy-H4, pyridine, 2H, dt,  $J = 7.2, 1.6$  Hz), 7.04 (ppy-H4, phenyl, 2H, dt,  $J = 7.6, 0.8$  Hz), 6.91 (ppy-H5, phenyl, 2H, dt,  $J = 6.8, 1.2$  Hz), 6.34 (ppy-H3, pyridine, 2H, d,  $J = 8$ ), 1.42 (18H, s). HRMS (ESI)  $m/z$  calculated for  $\text{C}_{40}\text{H}_{40}\text{N}_4\text{Ir}^+$  ( $[\text{M} - \text{PF}_6]^+$ ) 769.2876, found 769.2866.

## 5. Characterization data and HPLC chromatogram for the racemic and chiral tetrahydroisoquinoline derivatives.

### 1,2-Diphenyl-1,2,3,4-tetrahydroisoquinoline (**3a**)

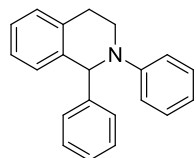

Use the general procedure described in the manuscript, compound **3a** was obtained from 2-phenyl-1,2,3,4-tetrahydroisoquinoline (0.1 mmol, 21.0 mg) and phenylboronic acid (0.3 mmol, 36.5 mg) as a white solid (21.4 mg) in 85% yield.

**Rf** (hexane/EtOAc 3:0.5): 0.8.

$^1\text{H}$  NMR ( $\text{CDCl}_3$ , 500 MHz):  $\delta = 7.38 - 7.10$  (m, 11H), 6.85 (m, 2H), 6.75 (m, 1H), 5.83 (s, 1H), 3.73 (dt,  $J = 11.1, 5.2$  Hz, 1H), 3.52 (ddd,  $J = 11.1, 8.6, 5.2$  Hz, 1H), 3.21 - 2.42 (m, 2H).  $^{13}\text{C}$  NMR

(CDCl<sub>3</sub>, 126 MHz):  $\delta$  = 149.5, 143.0, 137.8, 135.7, 129.1, 128.2, 128.0, 127.7, 127.2, 127.0, 126.7, 126.1, 117.4, 113.8, 62.7, 43.8, 28.0. HRMS (ESI) m/z: [M + H]<sup>+</sup> calculated for C<sub>21</sub>H<sub>20</sub>N 286.15903, found 286.15840.

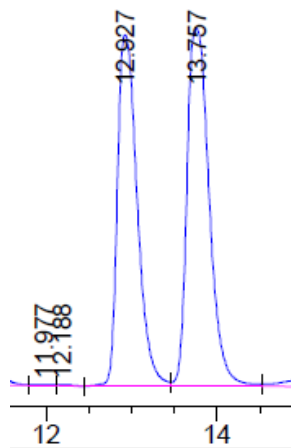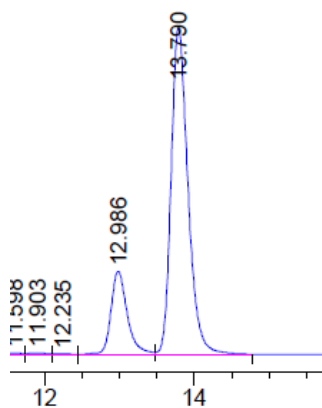

| Peak             | Retention Time / min | Area / % |
|------------------|----------------------|----------|
| Major Enantiomer | 12.986               | 19.2879  |
| Minor Enantiomer | 13.790               | 78.4008  |

**Figure 1S:** HPLC Chromatogram for the two enantiomers of compound **3a** synthesized according to the procedure described in Table 4, entry 1.

### 2-(2-Methoxyphenyl)-1-phenyl-1,2,3,4-tetrahydroisoquinoline (3b)

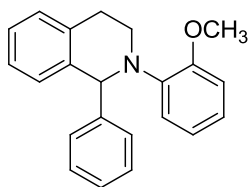

Use the general procedure described in the manuscript, compound **3b** was obtained from 2-(2-methoxyphenyl)-1,2,3,4-tetrahydroisoquinoline (0.1 mmol, 23.9 mg) and phenylboronic acid (0.3 mmol, 36.5 mg) as a white solid (17.6 mg) in 56% yield. **R<sub>f</sub>** (hexane/EtOAc 3:0.5): 0.7.

**<sup>1</sup>H NMR (CDCl<sub>3</sub>, 500 MHz):**  $\delta$  = 7.20 (m, 2H), 7.16 – 7.08 (m, 4H), 6.96 (m, 2H), 6.87 (m, 3H), 6.73 (m, 1H), 6.58 (m, 1H), 5.91 (s, 1H), 3.91 (s, 3H), 3.41 (ddd, J = 12.2, 10.3, 4.5 Hz, 1H), 3.31 (ddd, J = 12.2, 6.2, 3.0 Hz, 1H), 3.14 (ddd, J = 16.4, 10.3, 6.2 Hz, 1H), 2.96 (dt, J = 16.4, 3.0 Hz, 1H). **<sup>13</sup>C NMR (CDCl<sub>3</sub>, 126 MHz):**  $\delta$  = 153.0, 142.0, 140.0, 137.2, 135.0, 129.3, 128.8, 128.7, 127.3, 126.7, 126.2, 125.5, 122.9, 121.9, 120.8, 111.5, 62.7, 55.6, 43.0, 28.7. **HRMS (ESI) m/z:** [M + H]<sup>+</sup> calculated for C<sub>22</sub>H<sub>22</sub>NO 316.16959, found 316.16980.

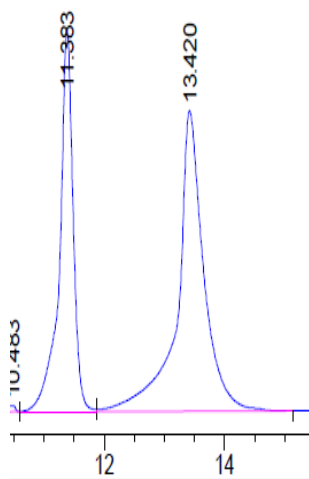



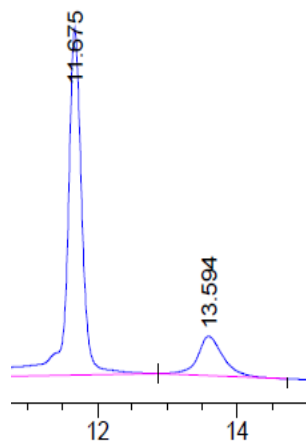

| Peak             | Retention Time / min | Area / % |
|------------------|----------------------|----------|
| Major Enantiomer | 11.675               | 60.1237  |
| Minor Enantiomer | 13.594               | 11.9011  |

### 2-(3-Methoxyphenyl)-1-phenyl-1,2,3,4-tetrahydroisoquinoline (3c)

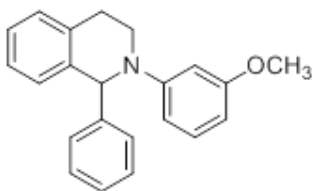

Use the general procedure in the manuscript, compound **3c** was obtained from 2-(3-methoxyphenyl)-1,2,3,4-tetrahydroisoquinoline (0.1 mmol, 23.9 mg) and phenylboronic acid (0.3 mmol, 36.5 mg) as a white solid (19.2 mg) in 61% yield. **R<sub>f</sub>** (hexane/EtOAc 3:0.5): 0.7.

**<sup>1</sup>H NMR (CDCl<sub>3</sub>, 500 MHz):**  $\delta$  = 7.37 – 6.99 (m, 10H), 6.60 – 6.14 (m, 3H), 5.83 (s, 1H), 3.76 (s, 3H), 3.75 – 3.67 (m, 1H), 3.51 (m, 1H), 2.93 (m, 2H). **<sup>13</sup>C NMR (CDCl<sub>3</sub>, 126 MHz):**  $\delta$  = 160.6, 150.8, 143.0, 137.8, 135.7, 129.8, 128.2, 128.0, 127.7, 127.1, 127.0, 126.7, 126.1, 106.7, 102.0, 100.2, 62.7, 55.1, 43.9, 28.0. **HRMS (ESI) m/z:** [M + H]<sup>+</sup> calculated for C<sub>22</sub>H<sub>22</sub>NO 316.16959, found 316.16950.

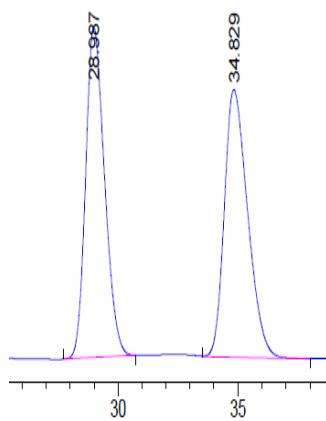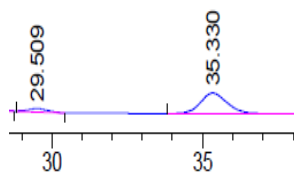

| Peak             | Retention Time / min | Area / % |
|------------------|----------------------|----------|
| Major Enantiomer | 29.509               | 1.8996   |
| Minor Enantiomer | 35.330               | 16.4503  |

### 2-(4-Methoxyphenyl)-1-phenyl-1,2,3,4-tetrahydroisoquinoline (**3d**)

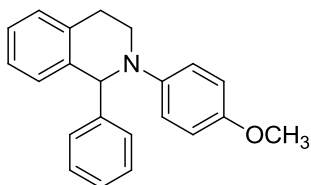

Use the general procedure described above, compound **3d** was obtained from 2-(4-methoxyphenyl)-1,2,3,4-tetrahydroisoquinoline (0.1 mmol, 23.9 mg) and phenylboronic acid (0.3 mmol, 36.5 mg) as a white solid (16.7 mg) in 53% yield. **R<sub>f</sub>** (hexane/EtOAc 3:0.5): 0.7

**<sup>1</sup>H NMR (CDCl<sub>3</sub>, 500 MHz):**  $\delta$  = 7.28 – 7.15 (m, 9H), 6.89 – 6.79 (m, 4H), 5.69 (s, 1H), 3.77 (s, 3H), 3.61 (ddd, *J* = 12.0, 6.7, 5.2 Hz, 1H), 3.44 (ddd, *J* = 12.0, 7.2, 5.2 Hz, 1H), 3.04 – 2.92 (m,

2H).  $^{13}\text{C}$  NMR ( $\text{CDCl}_3$ , 126 MHz):  $\delta = 152.8, 144.4, 143.2, 137.6, 135.5, 128.3, 128.1, 128.09, 128.02, 126.8, 126.7, 125.9, 117.7, 114.4, 64.3, 55.6, 44.5, 28.1$ .

HRMS (ESI)  $m/z$ :  $[\text{M} + \text{H}]^+$  calculated for  $\text{C}_{22}\text{H}_{22}\text{NO}$  316.16959, found 316.16847.

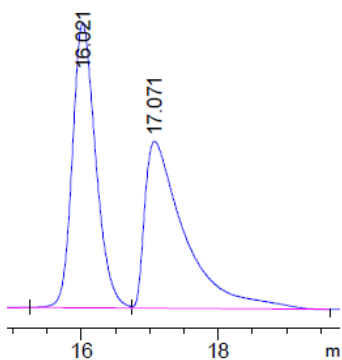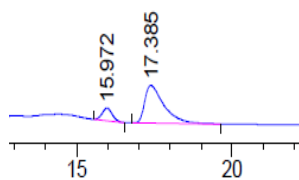

| Peak             | Retention Time / min | Area / % |
|------------------|----------------------|----------|
| Major Enantiomer | 15.972               | 3.1868   |
| Minor Enantiomer | 17.385               | 18.4472  |

### 1-Phenyl-2-(*p*-tolyl)-1,2,3,4-tetrahydroisoquinoline (**3<sup>e</sup>**)

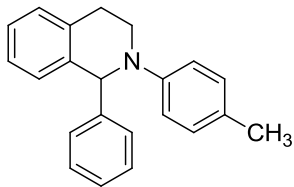

Use the general procedure described in the manuscript, compound **3e** was obtained from 2-(*p*-tolyl)-1,2,3,4-tetrahydroisoquinoline (0.1 mmol, 22.3 mg) and phenylboronic acid (0.3 mmol, 36.5 mg) as a white solid (23.3 mg) in 78% yield. **R<sub>f</sub>** (hexane/EtOAc 3:0.5): 0.75.

**<sup>1</sup>H NMR (CDCl<sub>3</sub>, 500 MHz):**  $\delta$  = 7.31 – 7.12 (m, 9H), 7.04 (m, 2H), 6.79 (m, 2H), 5.79 (s, 1H), 3.68 (dt, *J* = 11.4, 5.6 Hz, 1H), 3.49 (ddd, *J* = 11.4, 8.2, 5.6 Hz, 1H), 3.19 – 2.68 (m, 2H), 2.26 (s, 3H). **<sup>13</sup>C NMR (CDCl<sub>3</sub>, 126 MHz):**  $\delta$  = 147.5, 143.3, 137.8, 135.7, 129.6, 128.7, 128.17, 128.13, 127.9, 127.5, 126.9, 126.7, 126.0, 114.5, 63.1, 43.9, 27.9, 20.3. **HRMS (ESI) *m/z*:** [M + H]<sup>+</sup> calculated for C<sub>22</sub>H<sub>24</sub>NO 300.17468, found 300.17507.

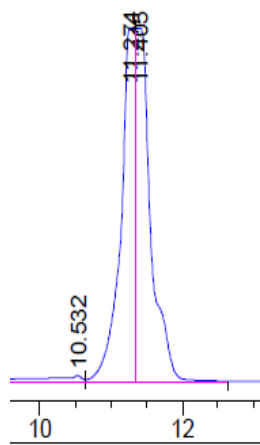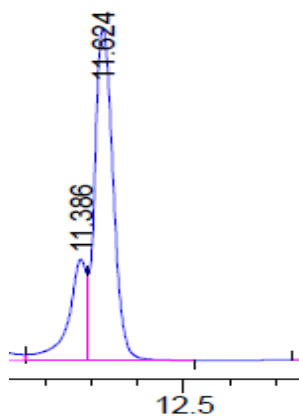

| Peak             | Retention Time / min | Area / % |
|------------------|----------------------|----------|
| Major Enantiomer | 11.386               | 20.9969  |
| Minor Enantiomer | 11.624               | 68.4203  |

### 2-(4-Bromophenyl)-1-phenyl-1,2,3,4-tetrahydroisoquinoline (3f)

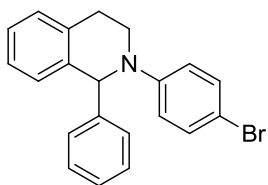

Use the general procedure described above, compound **3f** was obtained from 2-(4-bromophenyl)-1,2,3,4-tetrahydroisoquinoline (0.1 mmol, 28.8 mg) and phenylboronic acid (0.3 mmol, 36.5 mg) as a white solid (29.1 mg) in 80% yield. **Rf** (hexane/EtOAc 3:0.5): 0.85.

**<sup>1</sup>H NMR (CDCl<sub>3</sub>, 500 MHz):**  $\delta$  = 7.35 – 7.09 (m, 11H), 6.71 (m, 2H), 5.76 (s, 1H), 3.71 (dt, J = 11.2, 5.3 Hz, 1H), 3.47 (dt, J = 11.2, 7.2 Hz, 1H), 2.94 (m, 2H). **<sup>13</sup>C NMR (CDCl<sub>3</sub>, 126 MHz):**  $\delta$  = 148.3, 142.4, 137.5, 135.4, 131.8, 128.3, 128.0, 127.7, 127.2, 127.1, 126.9, 126.3, 115.4, 109.4, 62.8, 44.1, 27.9. **HRMS (ESI) m/z:** [M + H]<sup>+</sup> calculated for C<sub>21</sub>H<sub>19</sub>NBr 364.06954, found 364.06927.

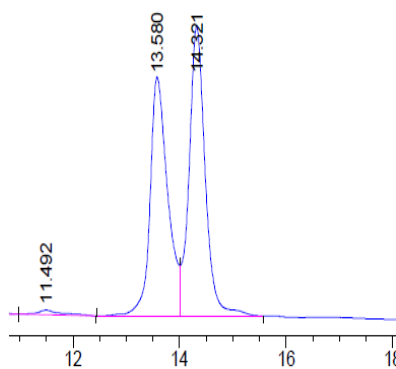

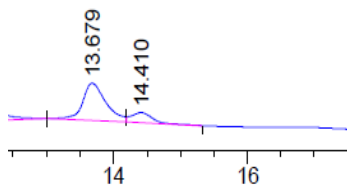

| Peak             | Retention Time / min | Area / % |
|------------------|----------------------|----------|
| Major Enantiomer | 13.679               | 6.0486   |
| Minor Enantiomer | 14.410               | 1.4782   |

### 1-(4-(2-Phenyl-1,2,3,4-tetrahydroisoquinolin-1-yl)phenyl)ethanone (**3g**)

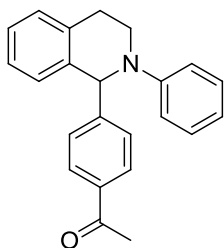

Use the general procedure described above, compound **3g** was obtained from 2-phenyl-1,2,3,4-tetrahydroisoquinoline (0.1 mmol, 21.0 mg) and (4-acetylphenyl)boronic acid (0.3 mmol, 49.2 mg) as a white solid (18.6 mg) in 57% yield. **Rf** (hexane/EtOAc 3:0.5): 0.45

**<sup>1</sup>H NMR (CDCl<sub>3</sub>, 500 MHz):**  $\delta$  = 7.91 – 7.83 (m, 2H), 7.43 – 7.37 (m, 2H), 7.35 – 7.17 (m, 6H), 6.95 – 6.76 (m, 3H), 5.87 (s, 1H), 3.78 (dt,  $J$  = 10.9, 5.2 Hz, 1H), 3.61 – 3.50 (m, 1H), 3.01 (q,  $J$  = 7.5, 5.2 Hz, 1H), 2.57 (s, 2H). **<sup>13</sup>C NMR (CDCl<sub>3</sub>, 126 MHz):**  $\delta$  = 197.7, 148.5, 137.0, 135.9, 135.6, 129.2, 128.4, 128.2, 127.7, 127.5, 127.4, 126.4, 124.4, 118.0, 114.0, 63.0, 44.2, 28.1, 26.6. **HRMS (ESI) m/z:** [M + H]<sup>+</sup> calculated for C<sub>23</sub>H<sub>22</sub>NO 328.1701, found 328.1697.

### 1-(4-Fluorophenyl)-2-phenyl-1,2,3,4-tetrahydroisoquinoline (3h)

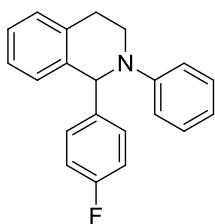

Use the general procedure described above, compound **3h** was obtained from 2-phenyl-1,2,3,4-tetrahydroisoquinoline (0.1 mmol, 21.0 mg) and (4-fluorophenyl)boronic acid (0.3 mmol, 42.0 mg) as a white solid (17.0 mg) in 56% yield. **Rf** (hexane/EtOAc 3:0.5): 0.55.

**<sup>1</sup>H NMR (CDCl<sub>3</sub>, 500 MHz):**  $\delta$  = 7.27 – 7.15 (m, 8H), 6.95 – 6.89 (m, 2H), 6.87 – 6.83 (m, 2H), 6.79 – 6.70 (m, 1H), 5.80 (s, 1H), 3.68 (dt, J = 11.4, 5.2 Hz, 1H), 3.50 (ddd, J = 11.4, 8.7, 5.2 Hz, 1H), 2.97 (dt, J = 15.6, 5.2 Hz, 1H), 2.88 (ddd, J = 15.6, 8.7, 5.3 Hz, H). **<sup>13</sup>C NMR (CDCl<sub>3</sub>, 126 MHz):**  $\delta$  = 162.7, 160.7, 149.4, 138.75, 138.73, 137.5, 135.6, 129.1, 128.9, 128.8, 128.2, 127.7, 127.1, 126.1, 117.8, 115.0, 114.8, 114.2, 104.9, 62.2, 43.6, 27.9. **<sup>19</sup>F NMR (CDCl<sub>3</sub>, 470 MHz):**  $\delta$  = -104.5. **HRMS (ESI) m/z:** [M + H]<sup>+</sup> calculated for C<sub>21</sub>H<sub>19</sub>NF 304.1496, found 304.1496.

### 1-(2,4-Difluorophenyl)-2-phenyl-1,2,3,4-tetrahydroisoquinoline (3i)

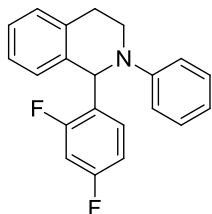

Use the general procedure described above, compound **3i** was obtained from 2-phenyl-1,2,3,4-tetrahydroisoquinoline (0.1 mmol, 21.0 mg) and (2,4-difluorophenyl)boronic acid (0.3 mmol, 47.3 mg) as a white solid (17.3 mg) in 54% yield. **Rf** (hexane/EtOAc 3:0.5): 0.5.

**<sup>1</sup>H NMR (CDCl<sub>3</sub>, 500 MHz):**  $\delta$  = 7.29 – 7.17 (m, 6H), 7.17 – 7.12 (m, 1H), 6.94 – 6.88 (m, 2H), 6.84 – 6.77 (m, 2H), 6.77 – 6.71 (m, 1H), 6.11 (s, 1H), 3.78 (dt, J = 11.7, 6.0 Hz, 1H), 3.59 (dt, J = 11.7, 6.0 Hz, 1H), 3.07 (t, J = 6.0 Hz, 2H). **<sup>13</sup>C NMR (CDCl<sub>3</sub>, 126 MHz):**  $\delta$  = 163.0, 162.9, 161.4, 161.3, 161.0, 160.9, 149.1, 136.4, 135.4, 130.2, 130.19, 130.16, 130.11, 129.1, 128.2, 127.96, 127.93, 127.29, 127.26, 127.18, 127.15, 127.0, 126.4, 118.5, 115.1, 111.04, 111.01, 110.87, 110.84, 104.1, 103.9, 103.7, 57.0, 44.0, 28.0. **<sup>19</sup>F NMR (CDCl<sub>3</sub>, 470 MHz):**  $\delta$  = -111.5, -111.9. **HRMS (ESI) m/z:** [M + H]<sup>+</sup> calculated for C<sub>21</sub>H<sub>18</sub>NF<sub>2</sub> 322.1402, found 322.1394.

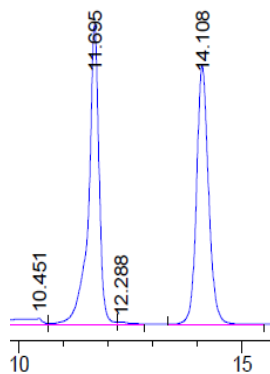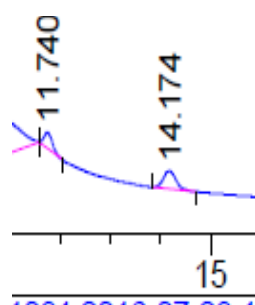

| Peak             | Retention Time / min | Area / % |
|------------------|----------------------|----------|
| Major Enantiomer | 11.740               | 1.8420   |
| Minor Enantiomer | 14.174               | 3.0673   |

### 1-(3,5-Bis(trifluoromethyl)phenyl)-2-phenyl-1,2,3,4-tetrahydroisoquinoline (**3j**)

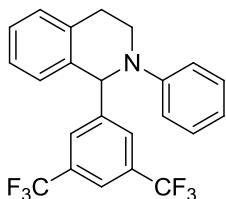

Use the general procedure described above, compound **3j** was obtained from 2-phenyl-1,2,3,4-tetrahydroisoquinoline (0.1 mmol, 21.0 mg) and (3,5-bis(trifluoromethyl)phenyl)boronic acid (0.3 mmol, 77.3 mg) as a white solid (13.9 mg) in 33% yield. **Rf** (hexane/EtOAc 3:0.5): 0.35.

**<sup>1</sup>H NMR (CDCl<sub>3</sub>, 500 MHz):**  $\delta$  = 7.72 (s, 1H), 7.69 (s, 2H), 7.29 – 7.20 (m, 6H), 7.02 – 6.72 (m, 3H), 5.85 (s, 1H), 3.65 (ddd, *J* = 11.5, 6.2, 5.0 Hz, 1H), 3.51 (ddd, *J* = 11.5, 8.5, 4.8 Hz, 1H), 3.01 (ddd, *J* = 15.8, 6.2, 4.8 Hz, 1H), 2.86 (ddd, *J* = 15.7, 8.5, 5.0 Hz, 1H). **<sup>13</sup>C NMR (CDCl<sub>3</sub>, 126 MHz):**  $\delta$  = 149.1, 146.3, 135.7, 135.6, 131.8, 131.6, 131.3, 131.0, 129.3, 128.6, 127.79, 127.70, 127.4, 126.6, 124.3, 122.1, 121.1, 119.0, 114.9, 104.9, 63.0, 44.0, 27.8. **<sup>19</sup>F NMR (CDCl<sub>3</sub>, 470**



**MHz):**  $\delta = -62.7$ . **HRMS (ESI) m/z:**  $[M + H]^+$  calculated for  $C_{23}H_{18}NF_6$  422.1338, found 422.1332.

### 1-(4-(tert-Butyl)phenyl)-2-phenyl-1,2,3,4-tetrahydroisoquinoline (3k)

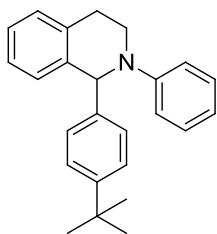

Use the general procedure described above, compound **3k** was obtained from 2-phenyl-1,2,3,4-tetrahydroisoquinoline (0.1 mmol, 21.0 mg) and (4-(tert-butyl)phenyl)boronic acid (0.3 mmol, 53.4 mg) as a white solid (20.1 mg) in 59% yield. **Rf** (hexane/EtOAc 3:0.5): 0.9.

**$^1H$  NMR (CDCl<sub>3</sub>, 500 MHz):**  $\delta = 7.37 - 7.06$  (m, 10H), 6.87 (m, 2H), 6.79 - 6.66 (m, 1H), 5.83 (s, 1H), 3.74 - 3.71 (m, 1H), 3.59 - 3.45 (m, 1H), 3.01 - 2.81 (m, 2H), 1.27 (s, 9H).  **$^{13}C$  NMR (CDCl<sub>3</sub>, 126 MHz):**  $\delta = 149.5, 139.9, 138.0, 135.7, 131.7, 129.1, 128.0, 127.8, 126.9, 126.8, 126.6, 126.0, 125.2, 125.1, 117.1, 115.0, 113.5, 62.3, 43.6, 34.3, 31.3, 27.8$ . **HRMS (ESI) m/z:**  $[M + H]^+$  calculated for  $C_{25}H_{28}N$  342.2216, found 342.2211.

### 1-(3-Methoxyphenyl)-2-phenyl-1,2,3,4-tetrahydroisoquinoline (3l)

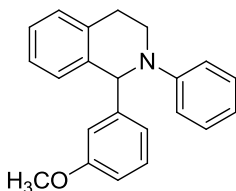

Use the general procedure described above, compound **3l** was obtained from 2-phenyl-1,2,3,4-tetrahydroisoquinoline (0.1 mmol, 21.0 mg) and (3-methoxyphenyl)boronic acid (0.3 mmol, 45.6 mg) as a white solid (23.3 mg) in 74% yield. **Rf** (hexane/EtOAc 3:0.5): 0.55

**$^1H$  NMR (CDCl<sub>3</sub>, 500 MHz):**  $\delta = 7.36 - 7.31$  (m, 1H), 7.30 - 7.18 (m, 6H), 6.94 - 6.85 (m, 4H), 6.83 - 6.74 (m, 2H), 5.84 (s, 1H), 3.91 - 3.75 (m, 4H), 3.59 - 3.51 (m, 1H), 2.99 (m, 2H).  **$^{13}C$  NMR (CDCl<sub>3</sub>, 126 MHz):**  $\delta = 159.5, 149.5, 145.0, 137.7, 135.7, 129.2, 129.1, 128.1, 127.8, 127.1, 126.2, 119.7, 117.5, 113.9, 113.5, 111.6, 62.9, 55.1, 43.8, 28.0$ . **HRMS (ESI) m/z:**  $[M + H]^+$  calculated for  $C_{22}H_{22}NO$  316.1701, found 316.1696.

### 2-Phenyl-1-(4-vinylphenyl)-1,2,3,4-tetrahydroisoquinoline (3m)

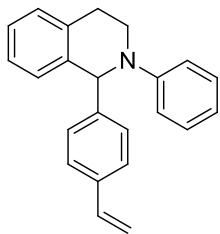

Use the general procedure described above, compound **3m** was obtained from 2-phenyl-1,2,3,4-tetrahydroisoquinoline (0.1 mmol, 21.0 mg) and (4-vinylphenyl) boronic acid (0.3 mmol, 44.4 mg) as a white solid (18.7 mg) in 60% yield. **Rf** (hexane/EtOAc 3:0.5): 0.9

**<sup>1</sup>H NMR (CDCl<sub>3</sub>, 500 MHz):**  $\delta$  = 7.34 – 7.30 (m, 3H), 7.29 – 7.27 (m, 1H), 7.27 – 7.23 (m, 5H), 7.22 – 7.18 (m, 1H), 6.91 – 6.86 (m, 1H), 6.82 – 6.76 (m, 1H), 6.69 (dd,  $J$  = 17.6, 10.9 Hz, 1H), 5.85 (s, 1H), 5.71 (dd,  $J$  = 17.6, 0.9 Hz, 1H), 5.22 (dd,  $J$  = 10.9, 0.9 Hz, 1H), 3.76 (dt,  $J$  = 11.0, 5.1 Hz, 0H), 3.54 (ddd,  $J$  = 11.0, 8.7, 5.1 Hz, 1H), 3.03 – 2.92 (m, 1H). **<sup>13</sup>C NMR (CDCl<sub>3</sub>, 126 MHz):**  $\delta$  = 149.5, 142.8, 137.7, 136.4, 136.2, 135.7, 129.1, 128.1, 127.7, 127.4, 127.0, 126.2, 126.1, 117.5, 113.9, 113.6, 62.6, 43.8, 28.1. **HRMS (ESI) m/z:** [M + H]<sup>+</sup> calculated for C<sub>23</sub>H<sub>22</sub>N 312.1752, found 312.1752.

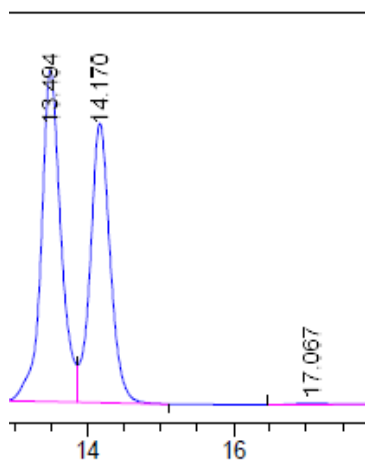

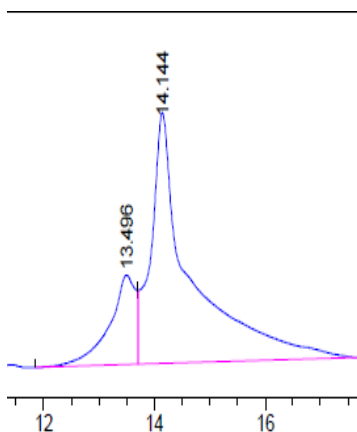

| Peak             | Retention Time / min | Area / % |
|------------------|----------------------|----------|
| Major Enantiomer | 13.496               | 10.2151  |
| Minor Enantiomer | 14.144               | 43.9473  |

### 6,7-Dimethoxy-1-(3-methoxyphenyl)-2-phenyl-1,2,3,4-tetrahydroisoquinoline (3n)

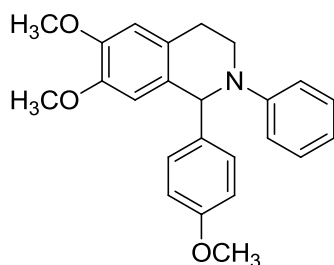

Use the general procedure described above, compound **3n** was obtained from 6,7-dimethoxy-2-phenyl-1,2,3,4-tetrahydroisoquinoline (0.1 mmol, 26.9 mg) and (4-methoxyphenyl)boronic acid (0.3 mmol, 45.6 mg) as a white solid (27.4 mg) in 73% yield. **R<sub>f</sub>** (hexane/EtOAc 3:0.5): 0.2

**<sup>1</sup>H NMR (CDCl<sub>3</sub>, 500 MHz):**  $\delta$  = 7.29 – 7.22 (m, 2H), 7.17 – 7.08 (m, 2H), 6.95 – 6.92 (m, 2H), 6.86 – 6.77 (m, 3H), 6.74 – 6.71 (m, 1H), 6.70 – 6.68 (m, 1H), 5.76 (s, 1H), 3.89 (s, 3H), 3.86 (s, 3H), 3.78 (s, 3H), 3.65 – 3.48 (m, 2H), 3.01 – 2.88 (m, 1H), 2.80 – 2.77 (m, 1H). **<sup>13</sup>C NMR (CDCl<sub>3</sub>, 126 MHz):**  $\delta$  = 158.5, 149.8, 147.8, 147.2, 135.4, 129.1, 128.8, 127.6, 117.9, 115.0, 114.7, 113.4, 111.2, 111.0, 61.9, 56.0, 55.9, 55.2, 42.91, 27.0. **HRMS (ESI) m/z:** [M + H]<sup>+</sup> calculated for C<sub>24</sub>H<sub>25</sub>NO<sub>3</sub> 376.1907, found 376.1914.

6. Effect of conditions on the coupling of 2-phenyl-1,2,3,4-tetrahydroisoquinoline with phenylboronic acid

**Table S1:** Effect of conditions on the coupling of 2-phenyl-tetrahydroisoquinoline with phenylboronic acid.

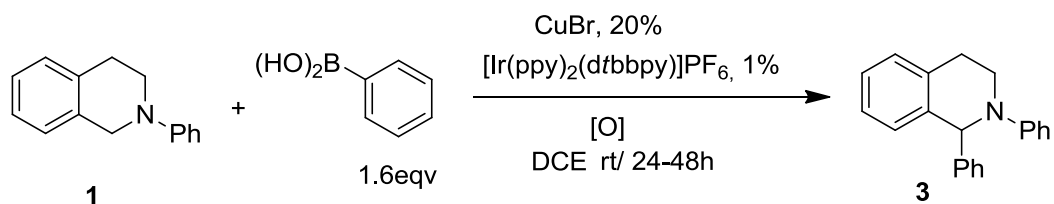

| Entry <sup>a</sup> | Oxidant                           | <b>1</b> , %    | <b>3</b> , Yield, % |
|--------------------|-----------------------------------|-----------------|---------------------|
| 1                  | T-HYDRO                           | ND <sup>b</sup> | 14                  |
| 2                  | TBHP                              | 29              | 19                  |
| 3                  | TBP                               | 50              | ND <sup>b</sup>     |
| 4                  | (BzO) <sub>2</sub>                | ND <sup>b</sup> | ND <sup>b</sup>     |
| 5                  | DDQ                               | ND <sup>b</sup> | ND <sup>b</sup>     |
| 6                  | dicumyl peroxide                  | 40              | ND <sup>b</sup>     |
| 7                  | <i>tert</i> -butyl peroxybenzoate | ND <sup>b</sup> | ND <sup>b</sup>     |
| 8                  | <i>tert</i> -butyl peracetate     | 18              | trace               |

<sup>a</sup> Conditions: 0.1 mmol 2-phenyltetrahydroisoquinoline, 0.16 mmol phenylboronic acid, 1 mol % [Ir(ppy)<sub>2</sub>(dtbbpy)]PF<sub>6</sub>, 20 mol % copper salt, and 0.2 mmol [O]. The yield was calculated by <sup>1</sup>H NMR integration method using CH<sub>2</sub>Br<sub>2</sub> as an internal standard. <sup>b</sup> The desired product was not detected.

**Table S2:** Effect of conditions on the coupling of 2-phenyl-tetrahydroisoquinoline with phenylboronic acid.

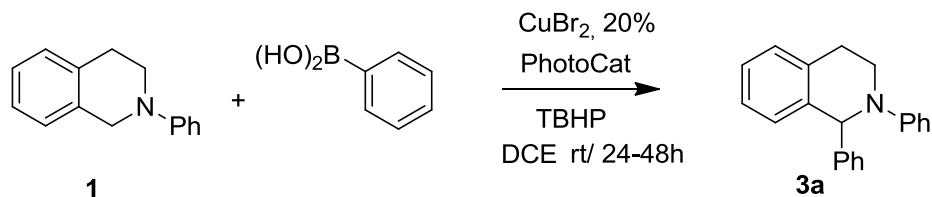

| entry | photo catalyst using                                               | <b>3a</b> , % NMR |
|-------|--------------------------------------------------------------------|-------------------|
| 1     | [Ir(ppy) <sub>2</sub> (dtbbpy)]PF <sub>6</sub>                     | 85                |
| 2     | [Ir(dF(CF <sub>3</sub> )ppy) <sub>2</sub> (dtbbpy)]PF <sub>6</sub> | 29                |
| 3     | [Ru(bpy) <sub>3</sub> ](PF <sub>6</sub> ) <sub>2</sub>             | 72                |

<sup>a</sup> Conditions: 0.1 mmol 2-phenyl-tetrahydroisoquinoline, 0.3 mmol phenylboronic acid, 1 mol % [Ir(ppy)<sub>2</sub>(dtbbpy)]PF<sub>6</sub>, 20 mol % copper salt, and 0.2 mmol TBHP. The yield was calculated by <sup>1</sup>H NMR integration method using CH<sub>2</sub>Br<sub>2</sub> as an internal standard.

**Table S3:** Effect of chiral ligand on the enantioselectivity of coupling 2-phenyl-tetrahydroisoquinoline with phenylboronic acid at 4 C.<sup>a</sup>

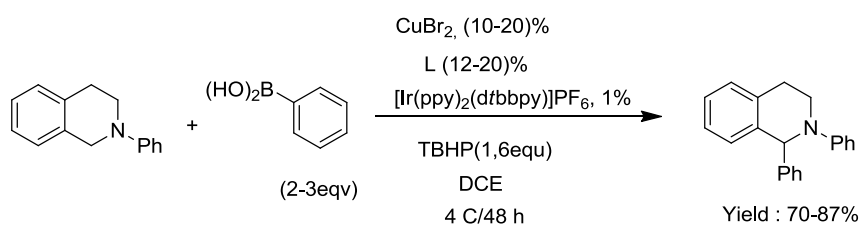

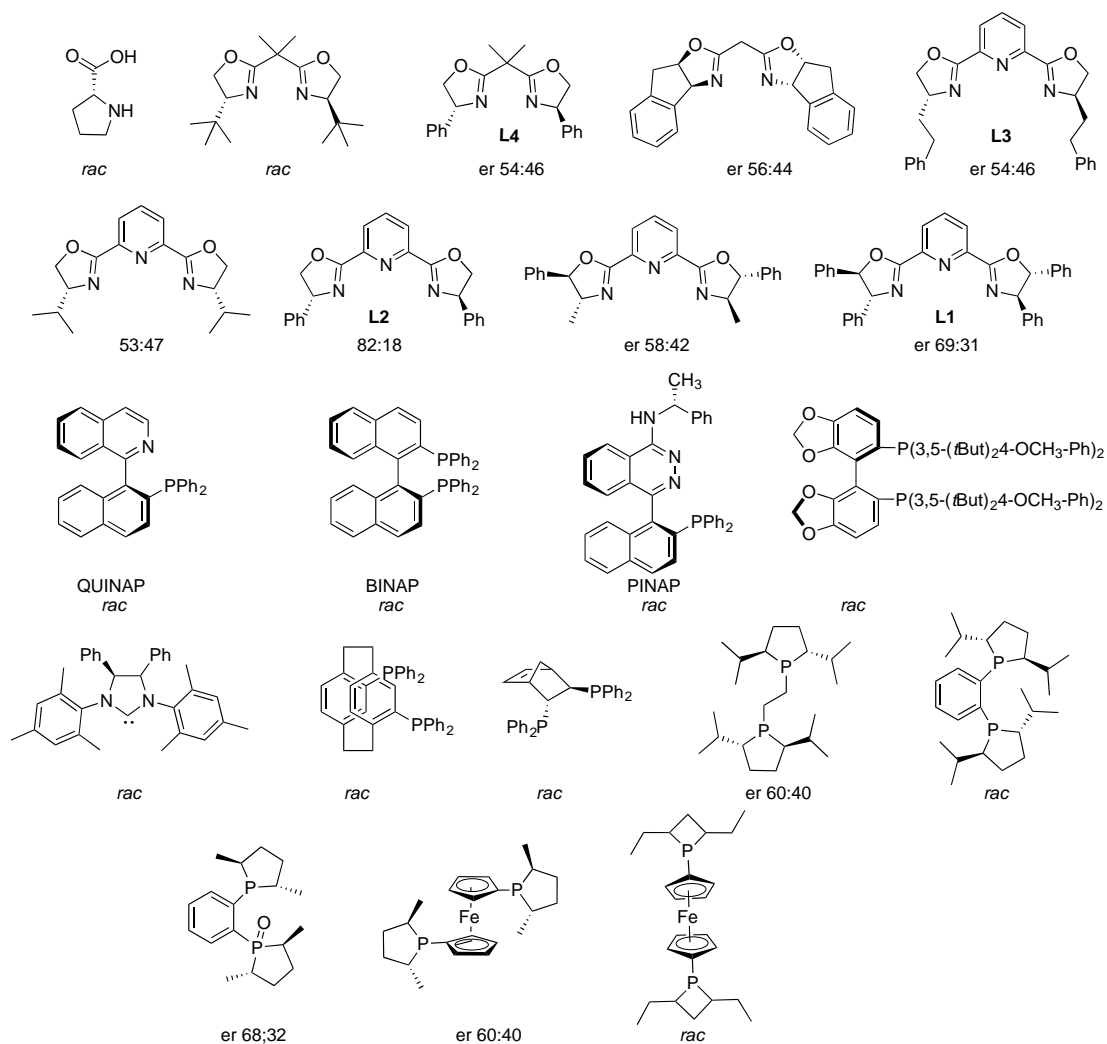

<sup>a</sup>Reaction conditions: THIQs (0.10 mmol), arylboronic acid (0.30 mmol), TBHP (0.2 mmol), [Ir(ppy)<sub>2</sub>(dtbbpy)]PF<sub>6</sub> (0.001 mmol), CuBr (0.01 mmol), L\* (0.012 mmol), DCE (0.5 mL), under argon atmosphere. All reported yields enantiomeric ratios were determined using a Chiralcel OD-H column and 96:4 hexane/isopropanol as an eluent.

## 7. NMR data for 1-aryl-2-aryl-1,2,3,4-tetrahydroisoquinoline derivatives

3a

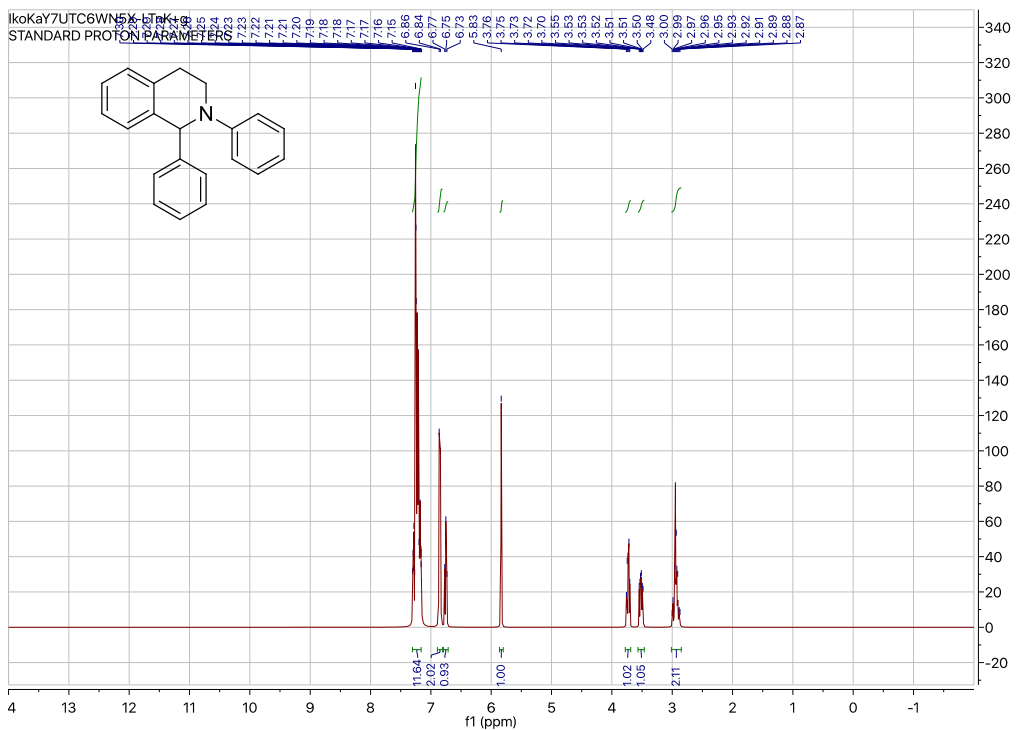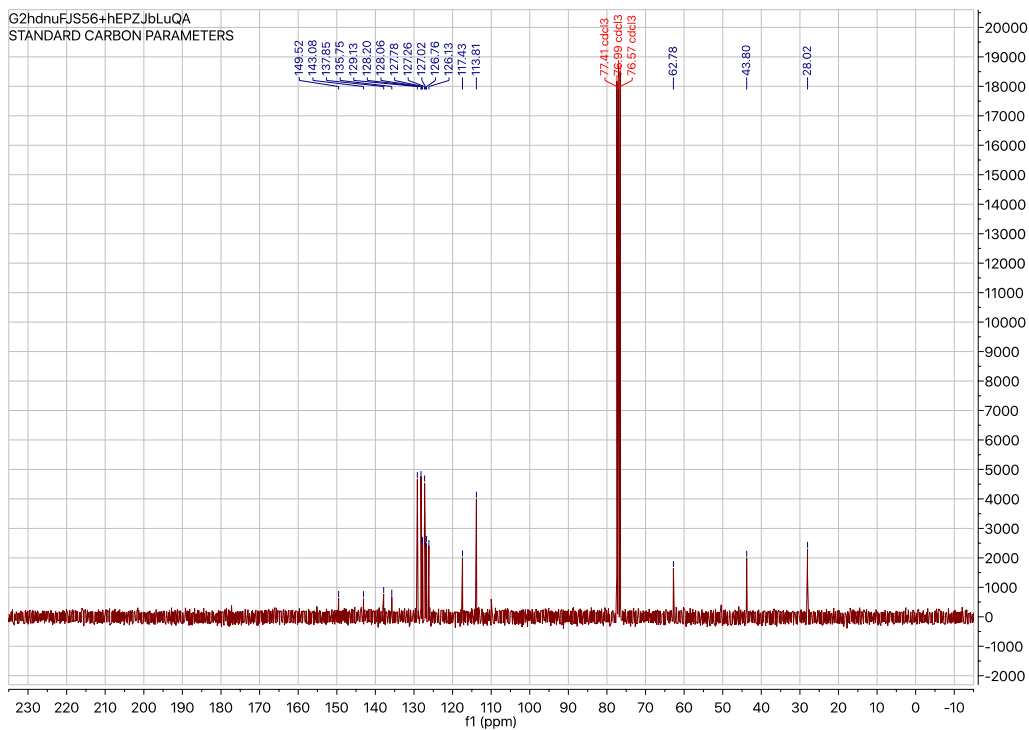

3b

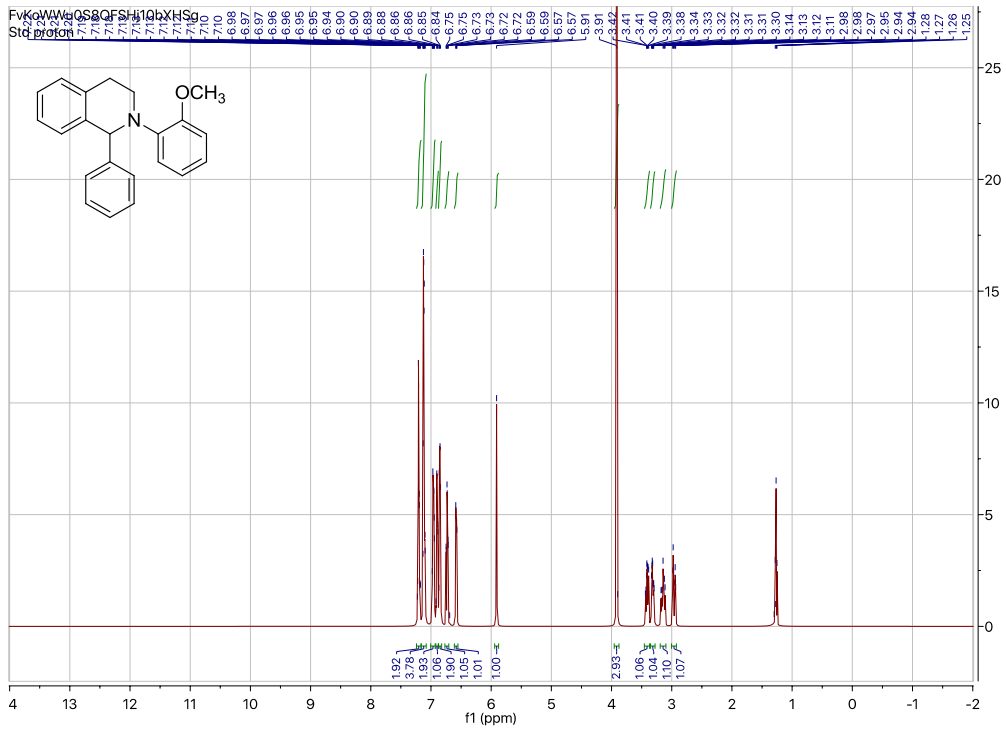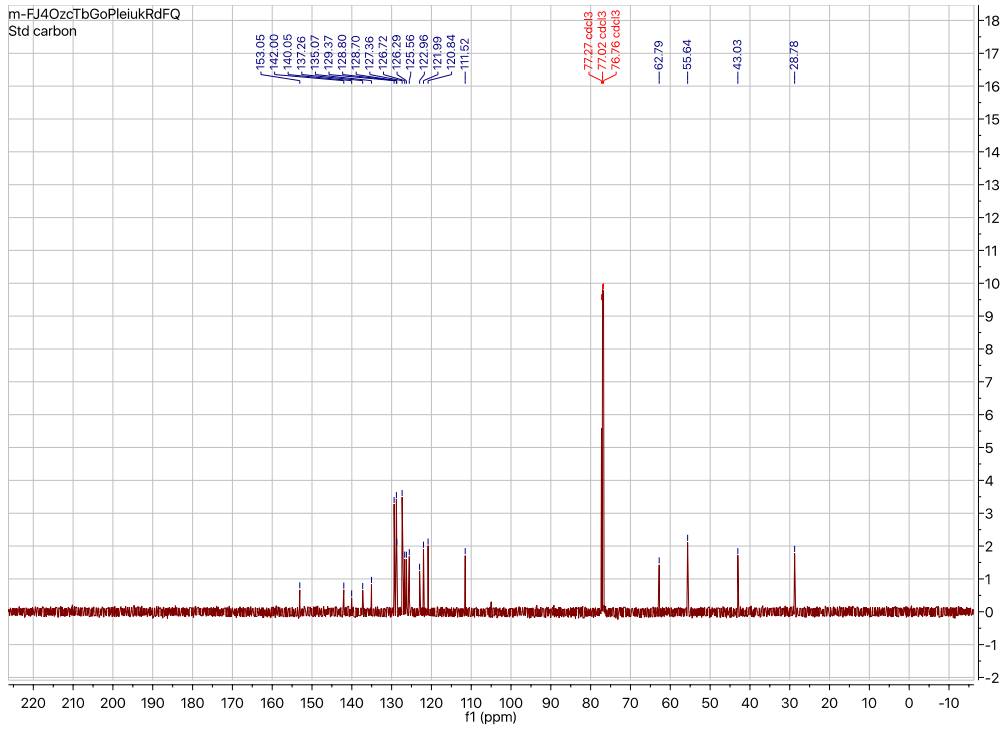



3c

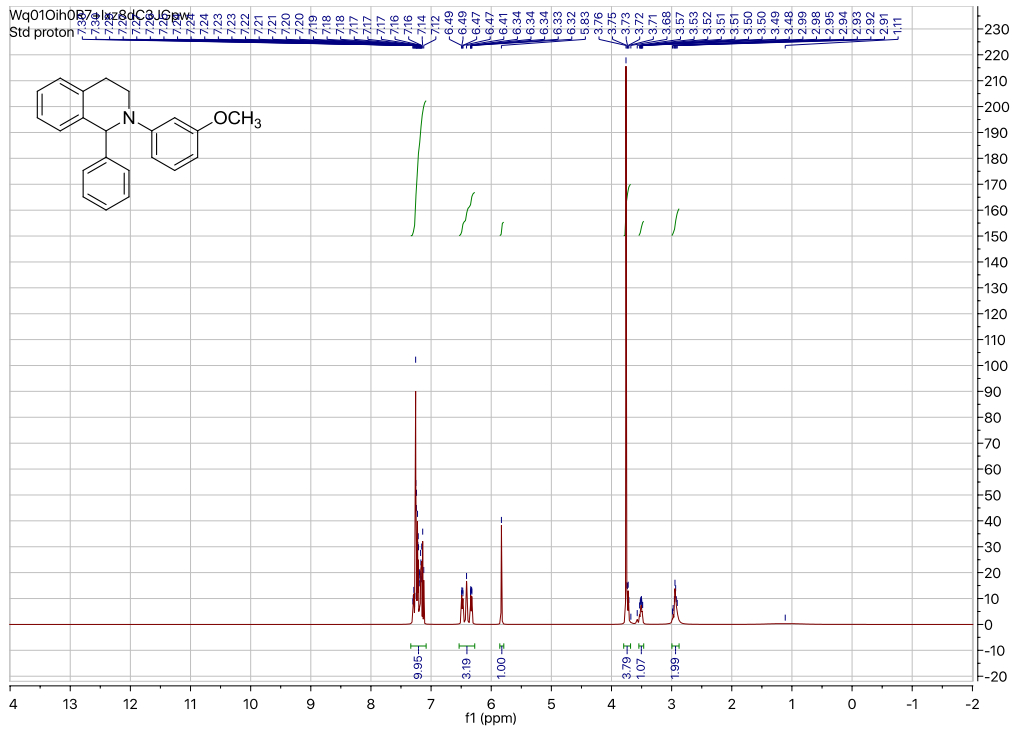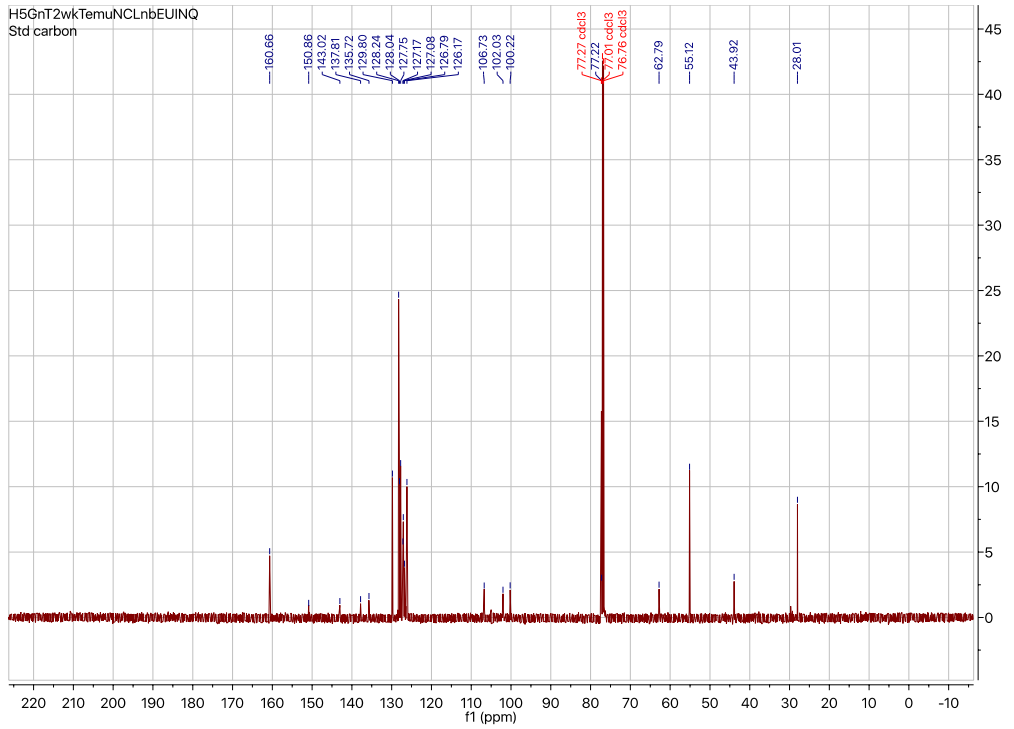

3d

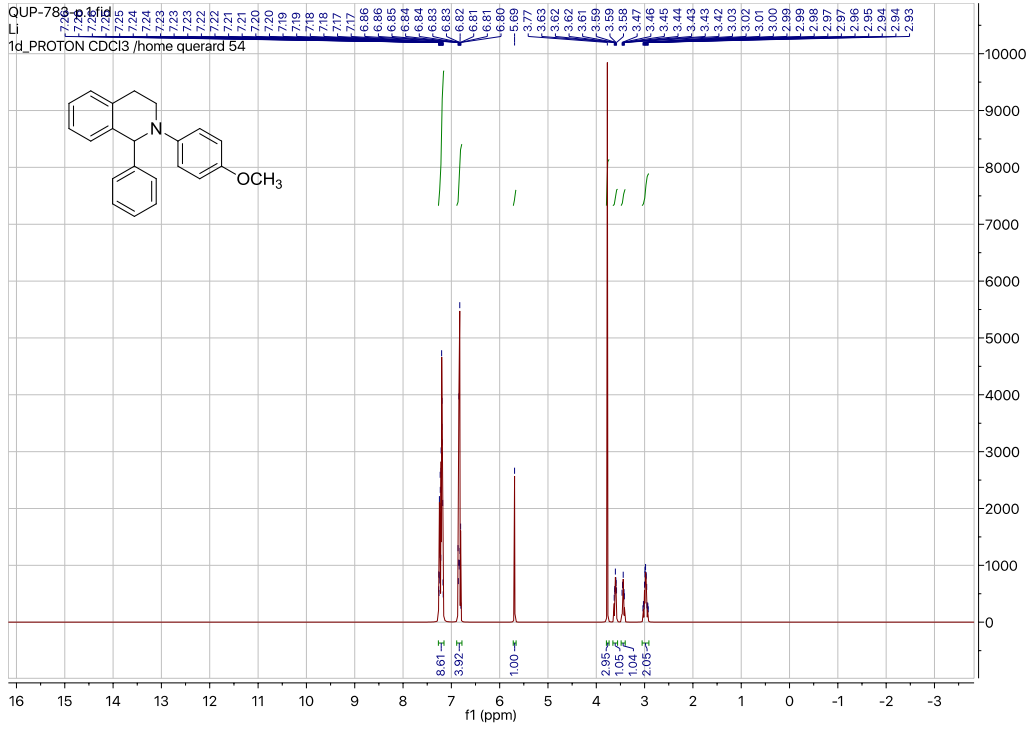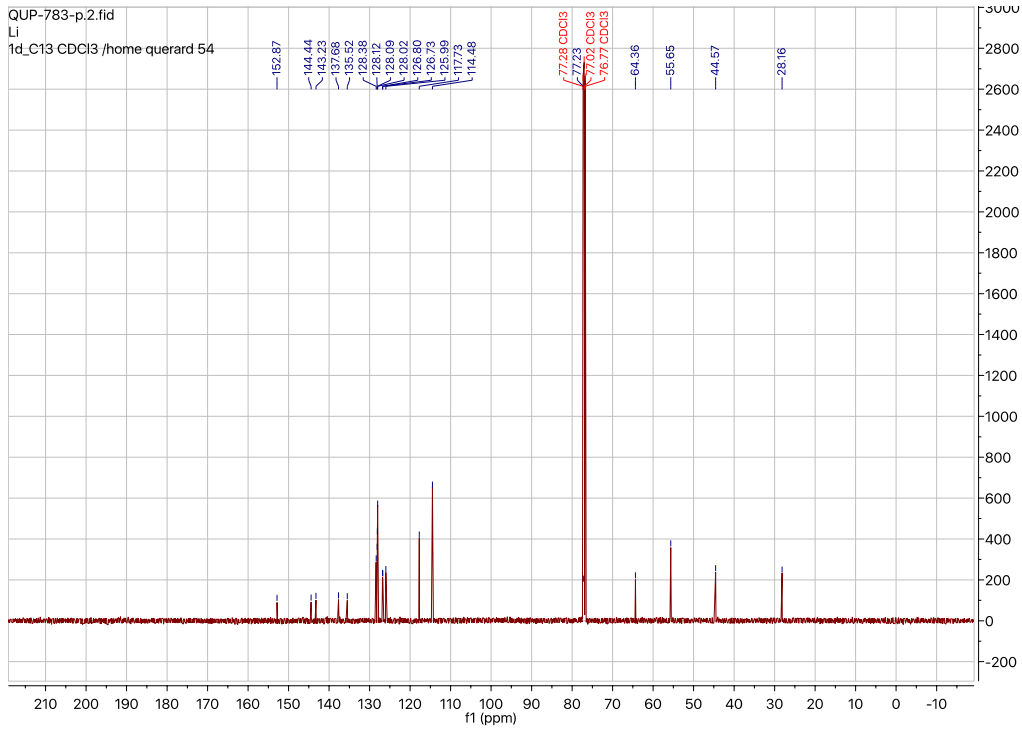

3e

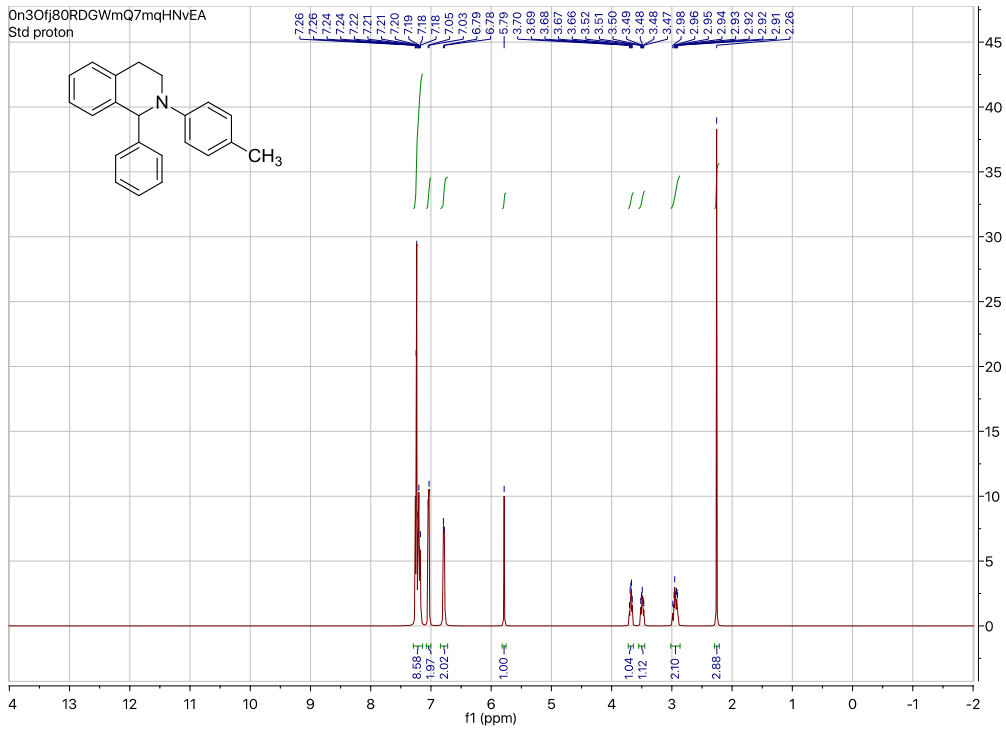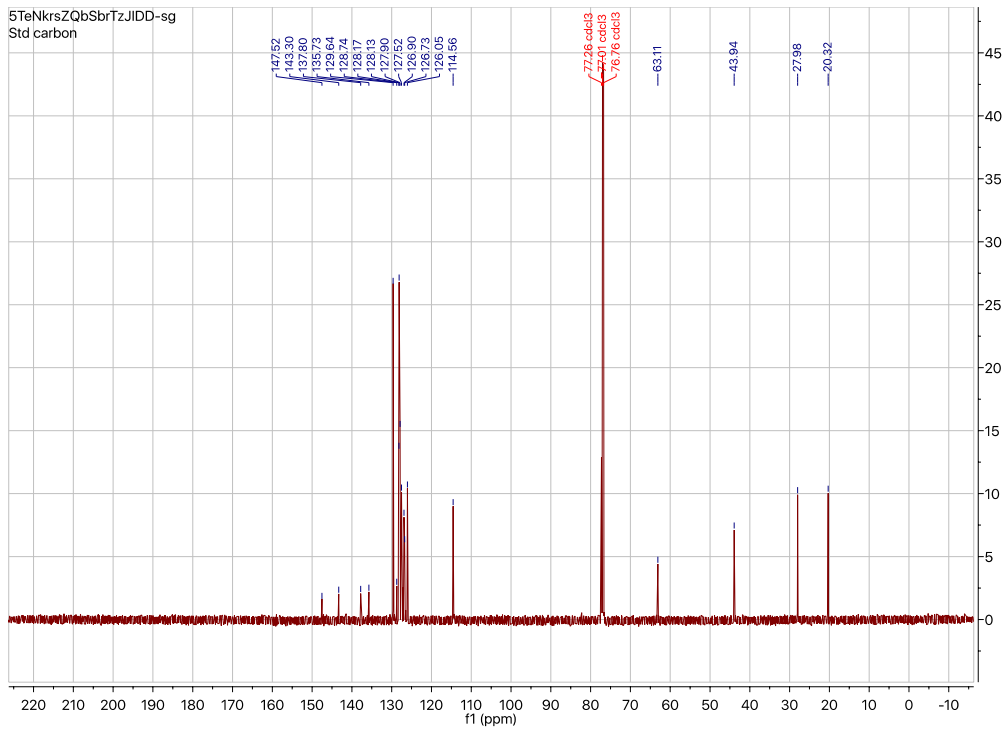

3f

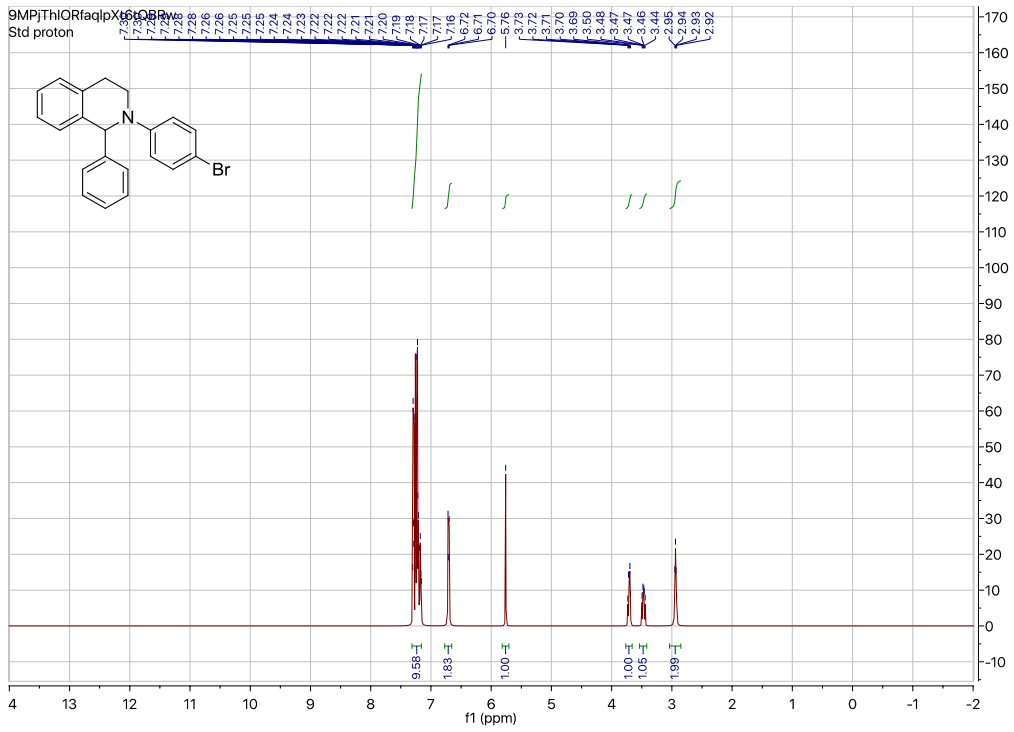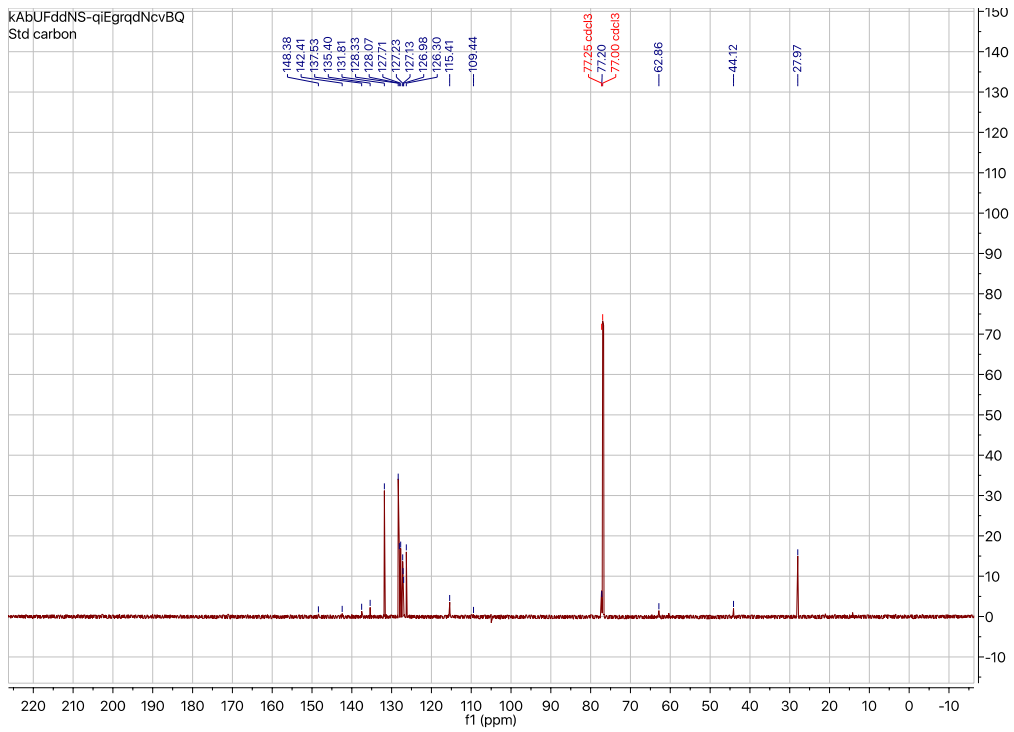

3g

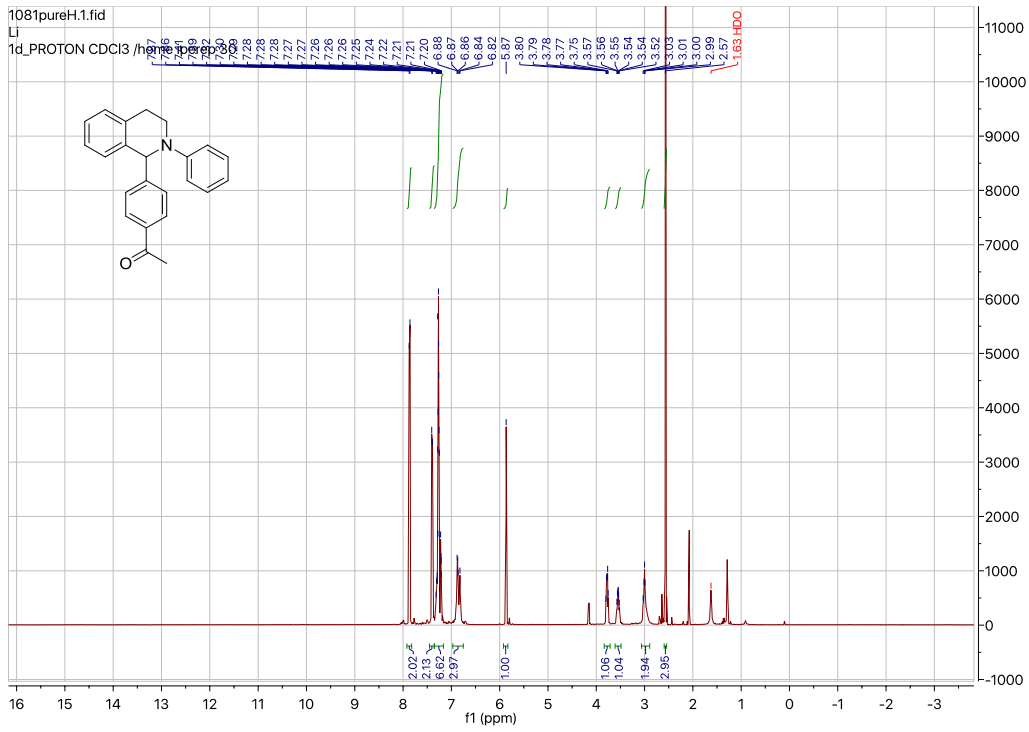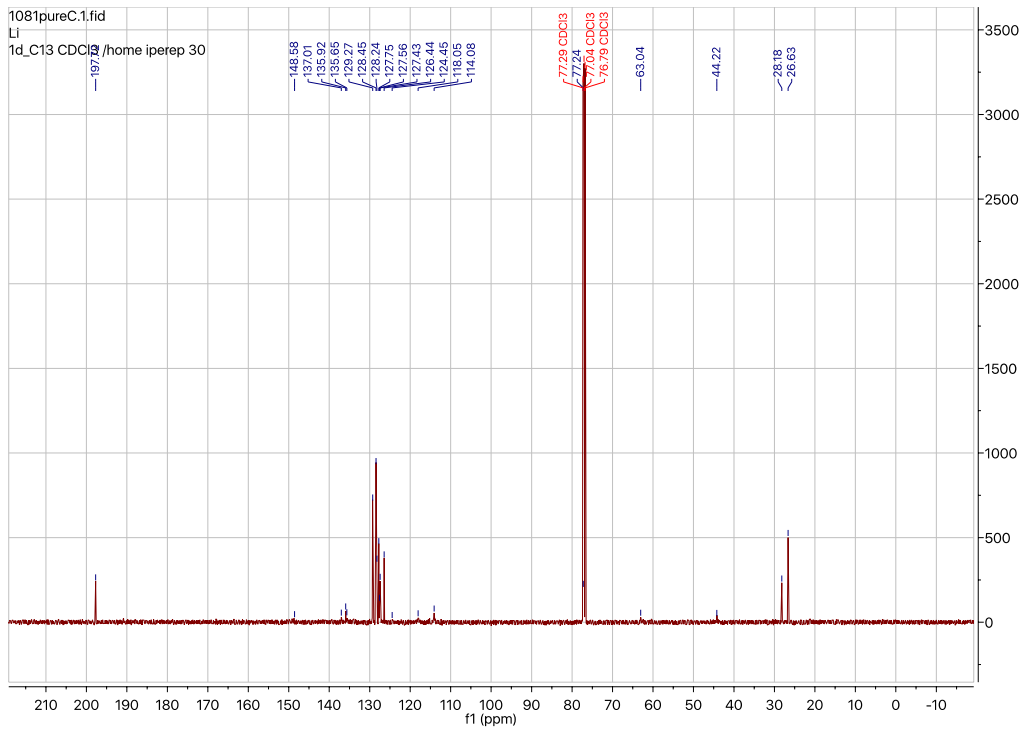

3h

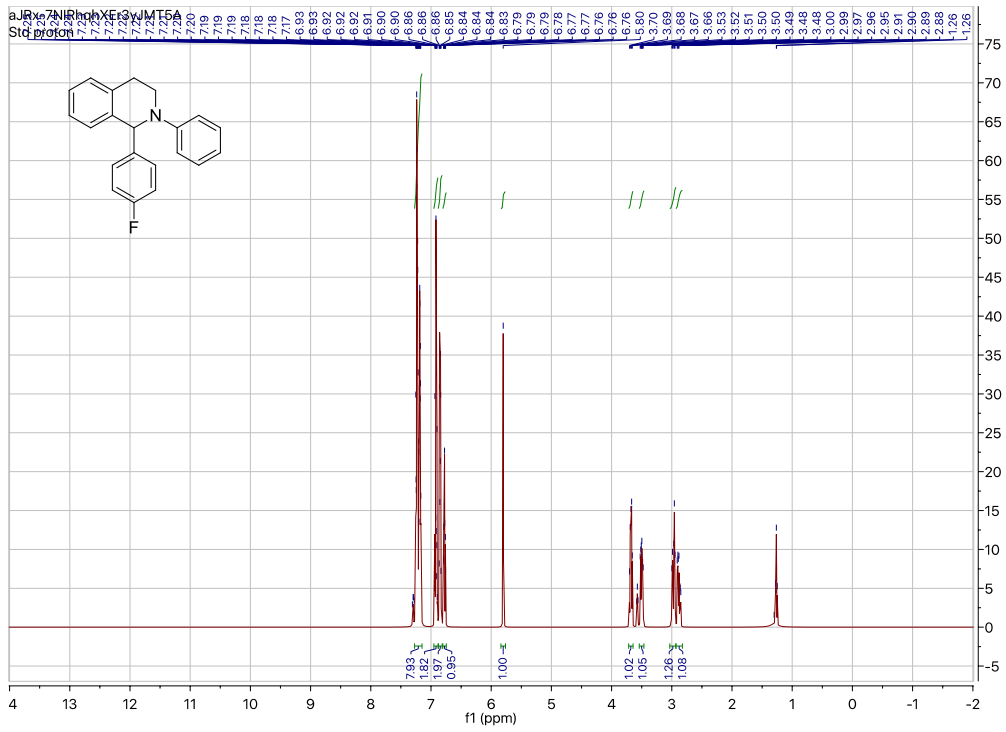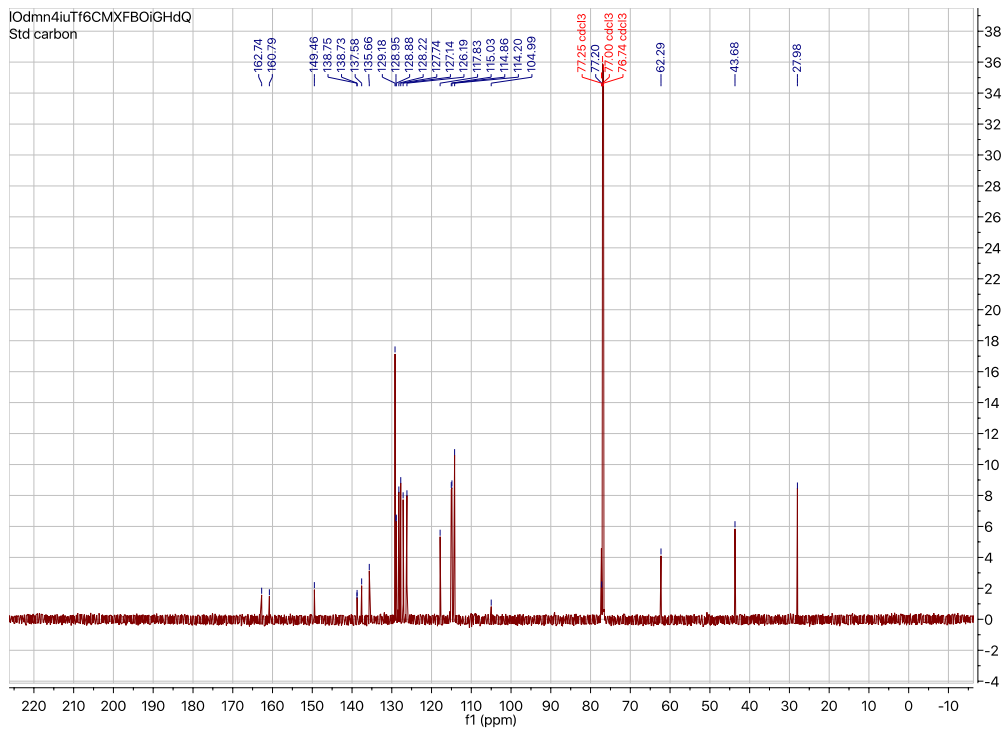

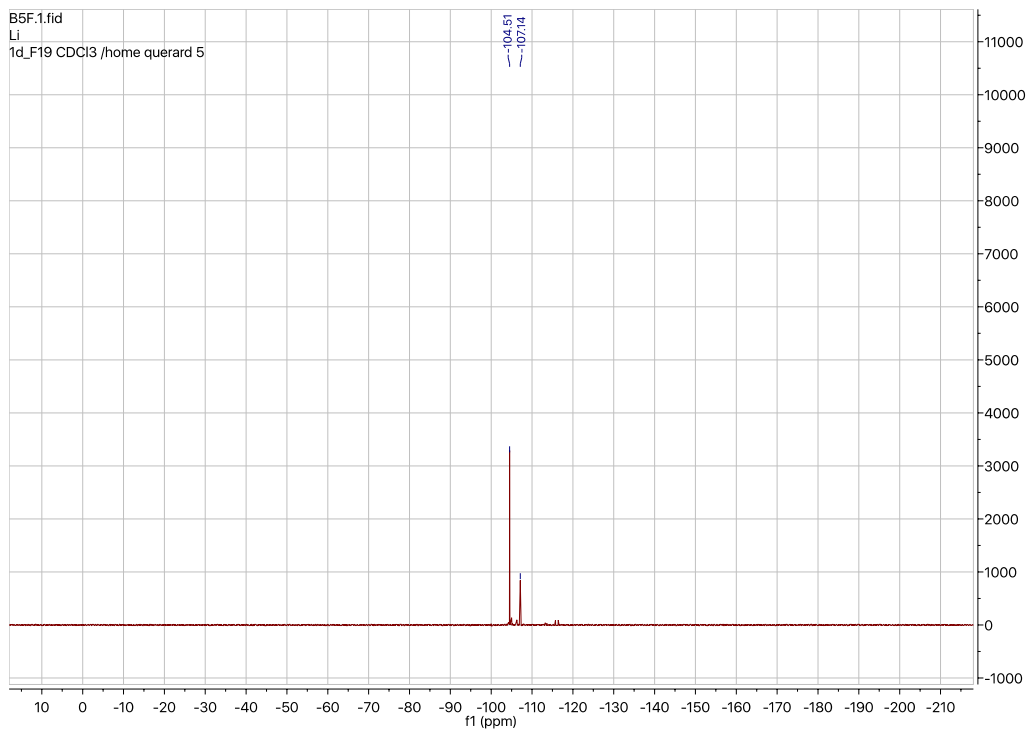

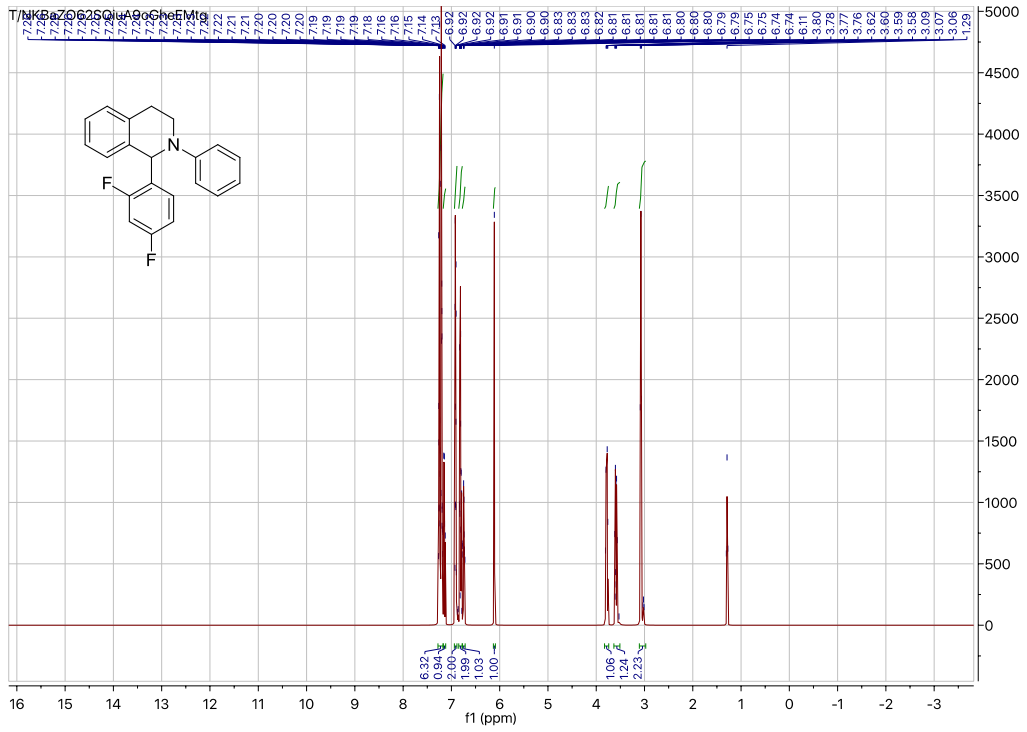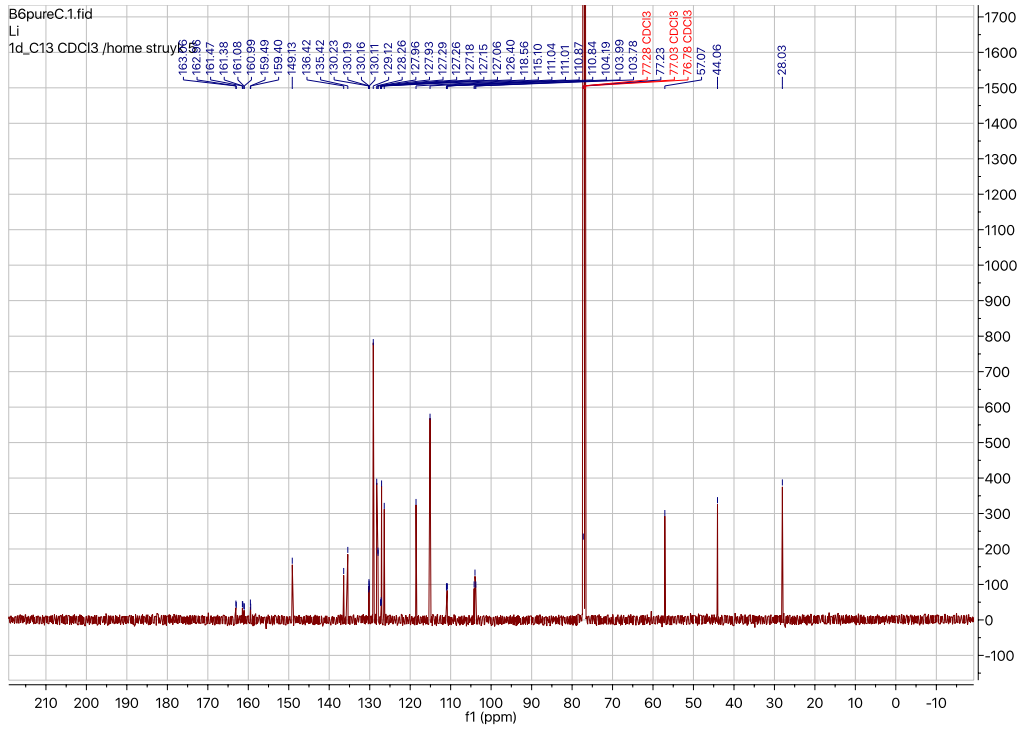



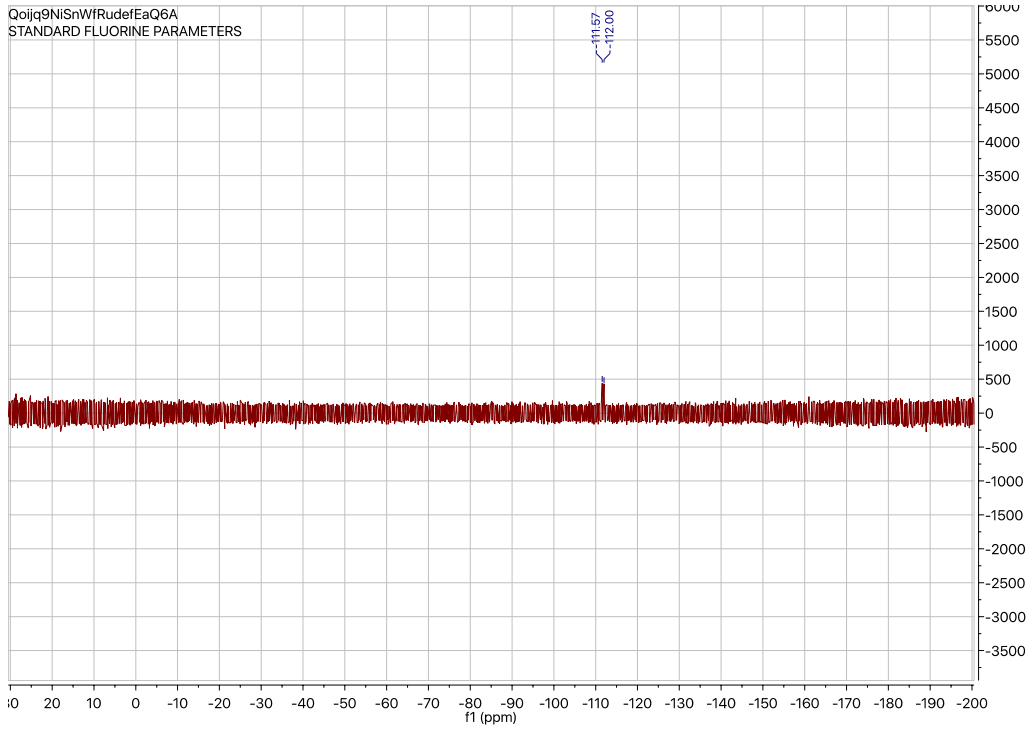

3j

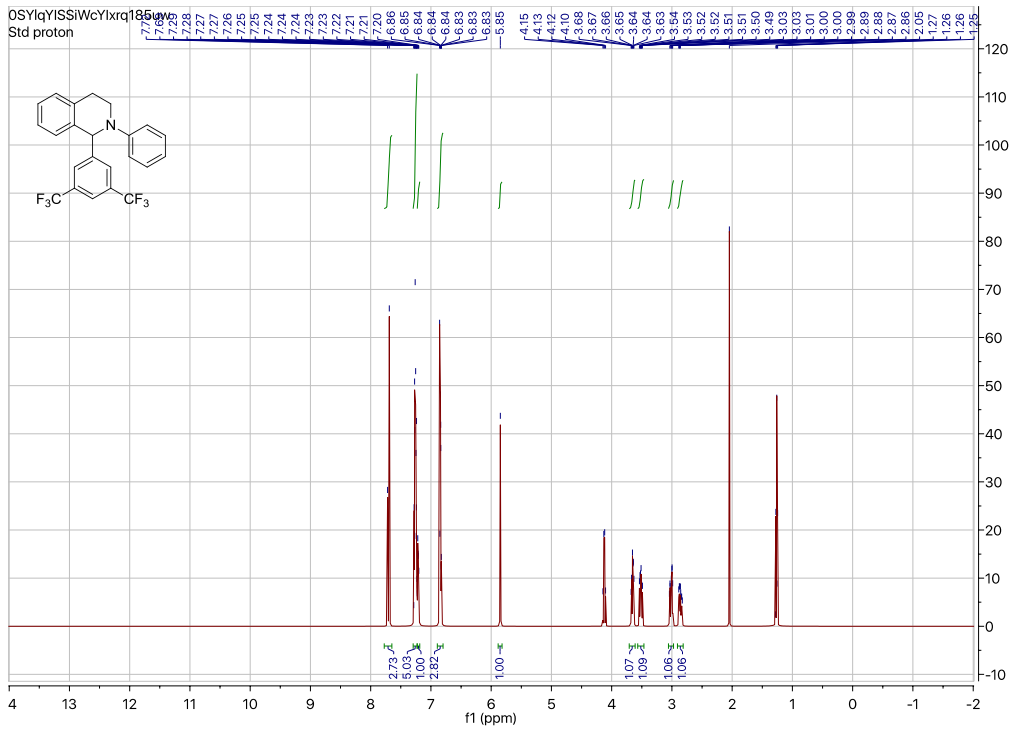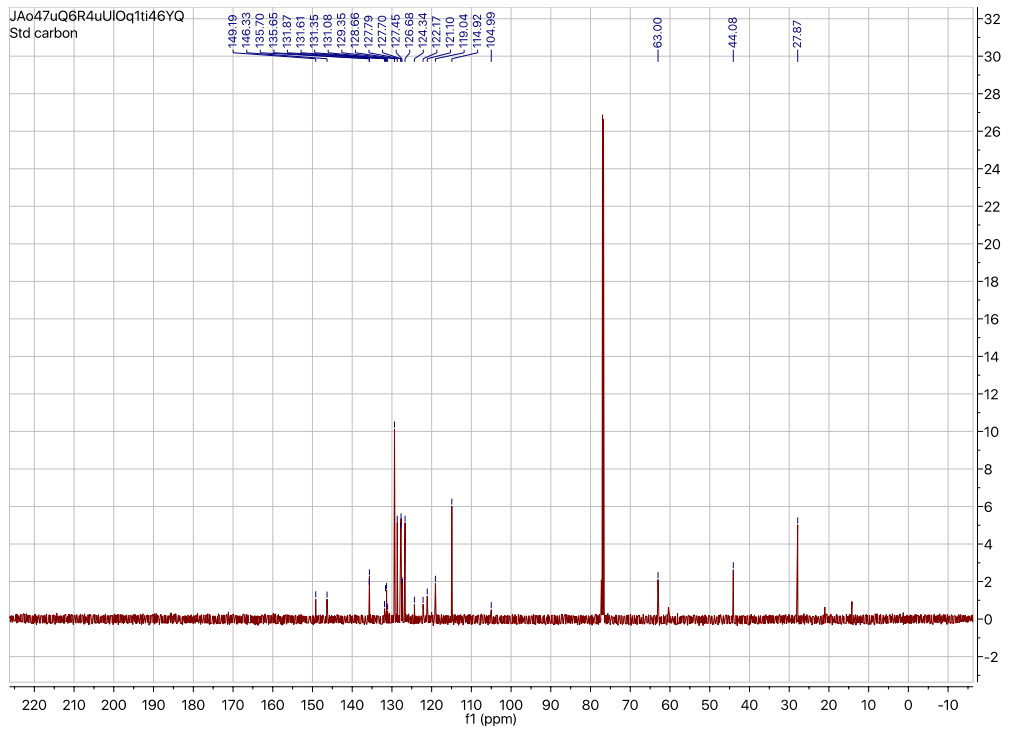

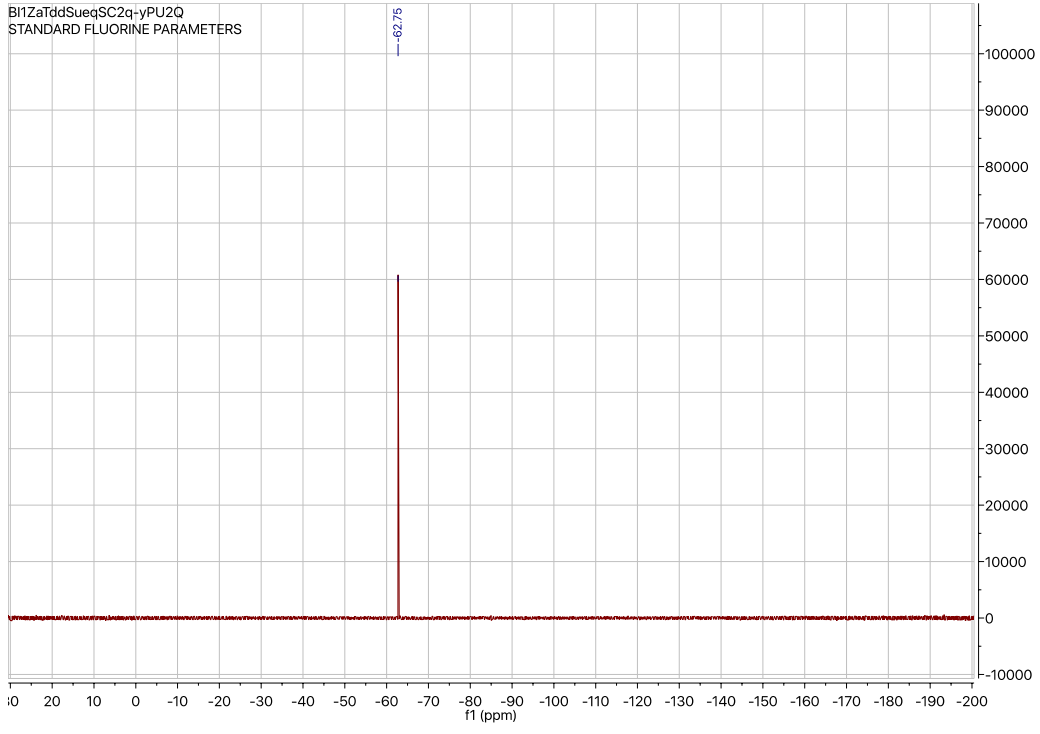

3k

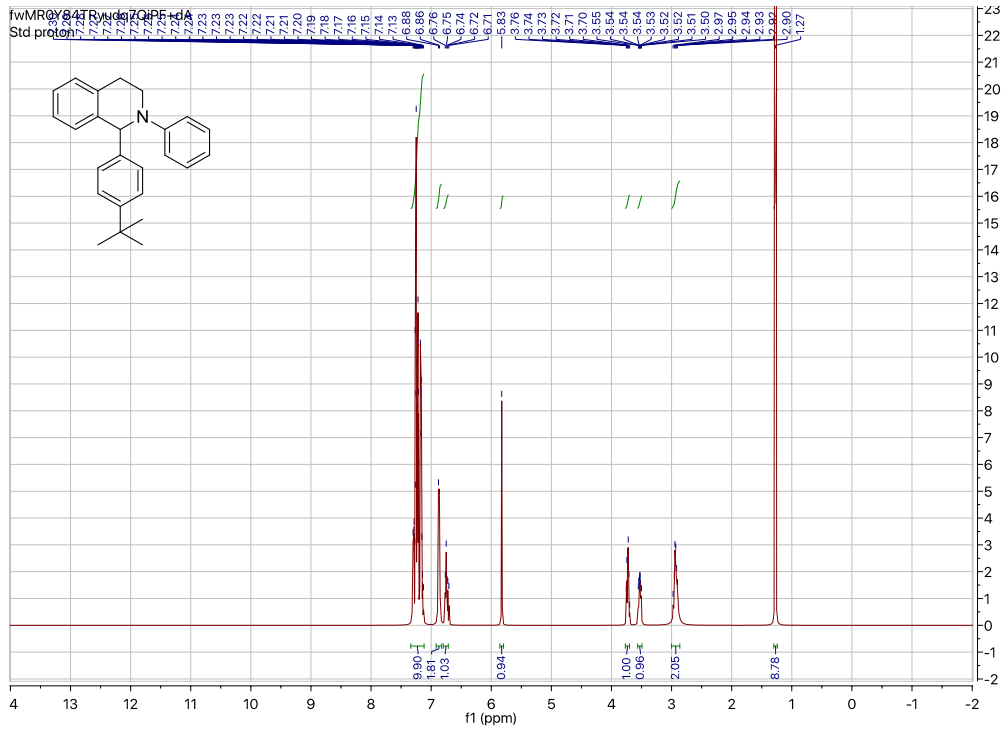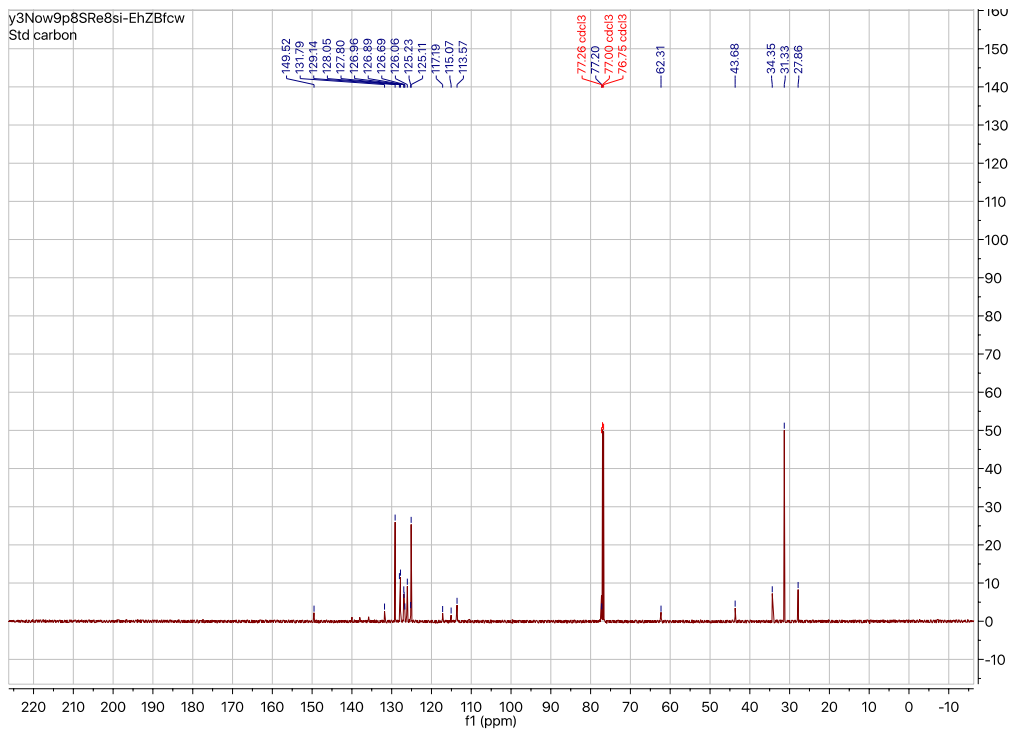

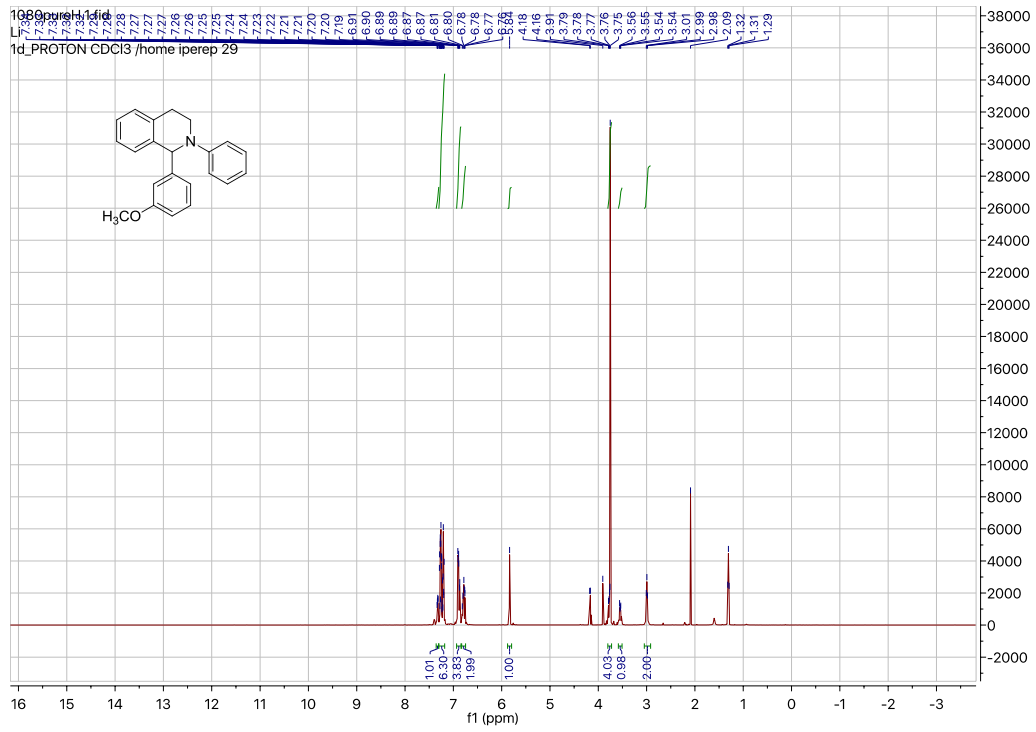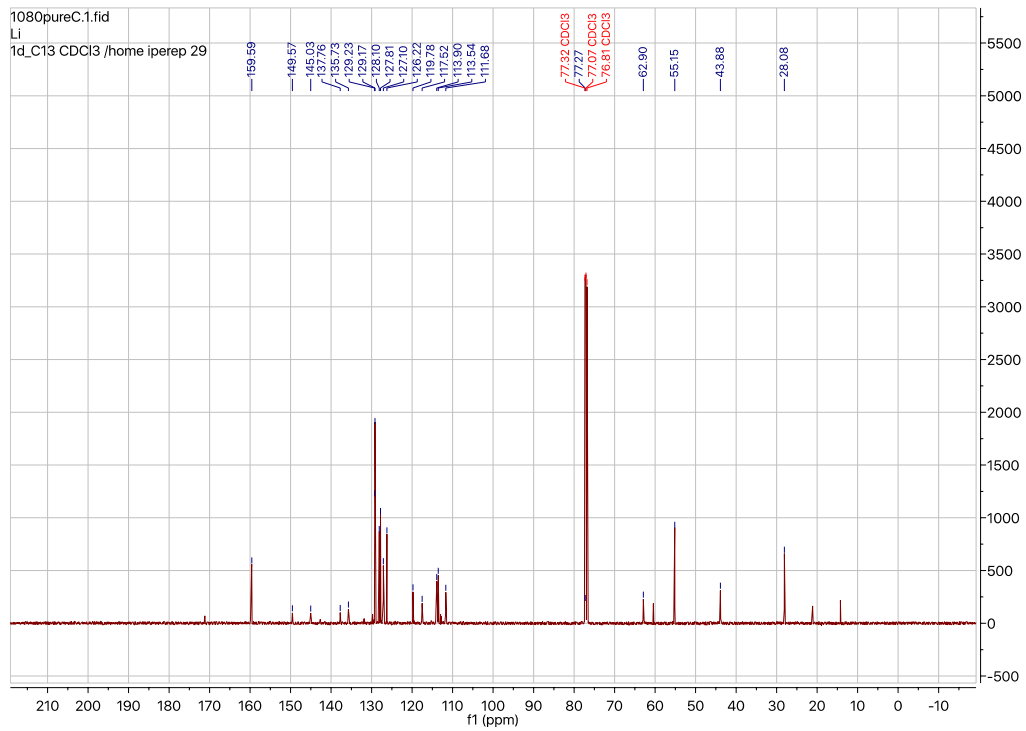

3m

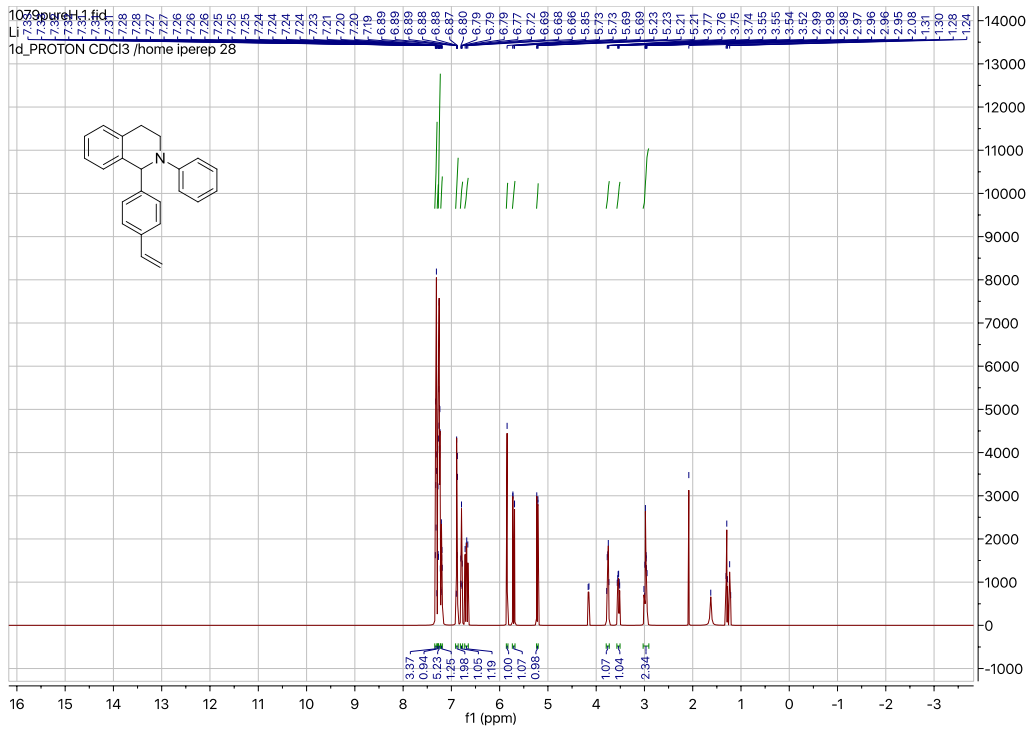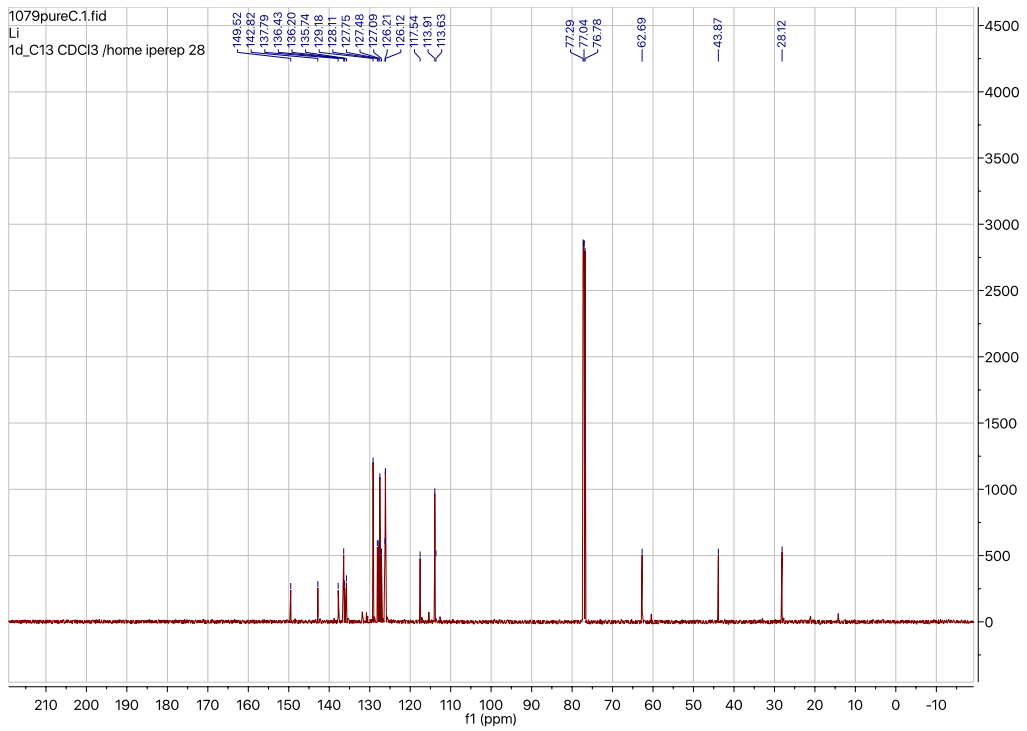

3n

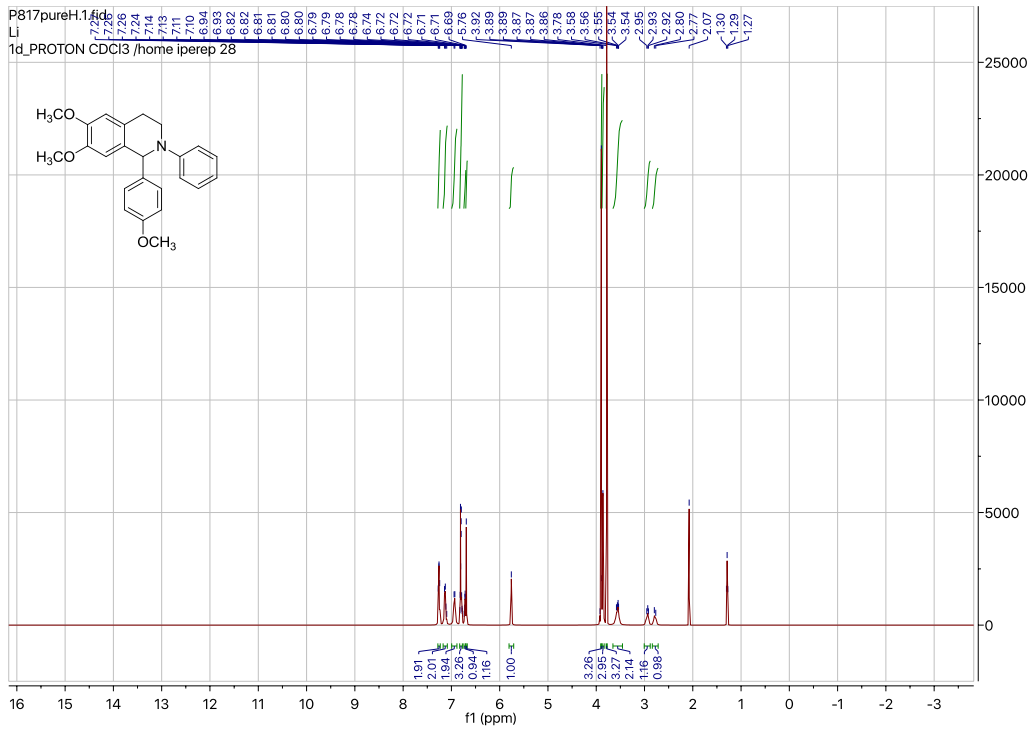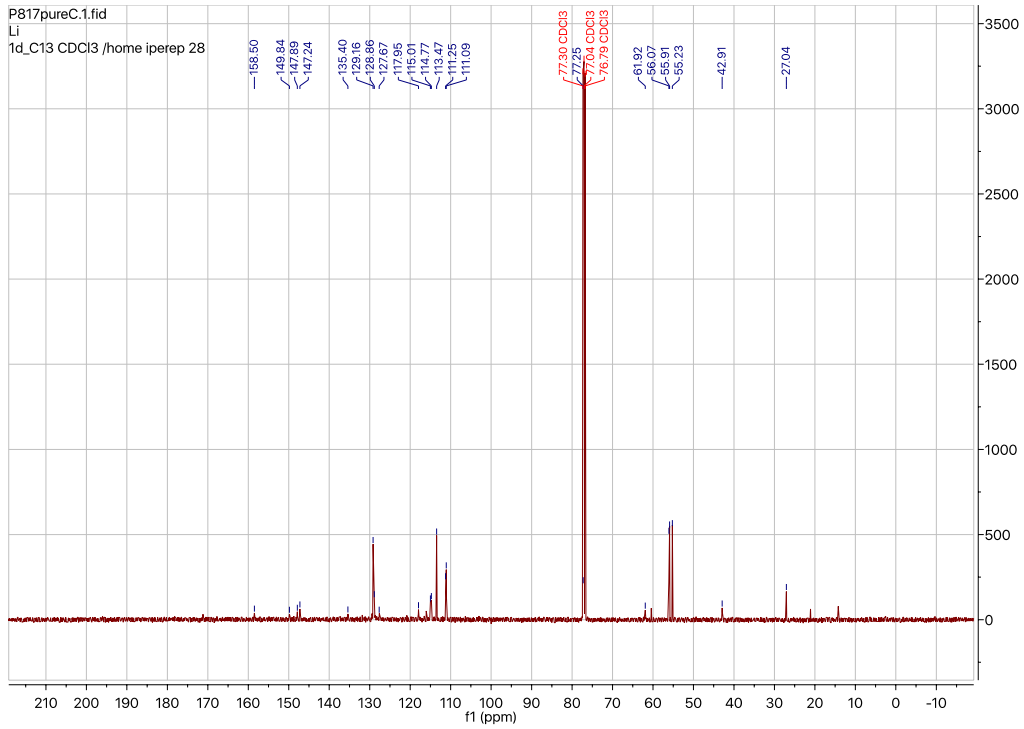

- 
- <sup>1</sup> Zhiping Li, Z.; MacLeod, P. D.; Li, C.-J. *Tetrahedron Lett.* **2002**, *43*, 5731
- <sup>2</sup> Rueping, M.; Koenigs, R. M.; Poschary, K.; Fabry, D. C.; Leonori, D.; Carlos Vila, C. *Chem. Eur. J.* **2012**, *18*, 5170
- <sup>3</sup> Kwong, F. Y.; Klapars, A.; Buchwald, S. L. *Org. Lett.* **2002**, *4*, 581
- <sup>4</sup> Slinker, J. D.; Gorodetsky, A. A.; Lowry, M. S.; Wang, J.; Parker, S.; Rohl, R.; Bernhard, S.; Malliaras, G. *J. Am. Chem. Soc.* **2004**, *126*, 2763
- <sup>5</sup> Sprouse, S.; King, K. A.; Spellane, P. J.; Watts, R. J. *J. Am. Chem. Soc.* **1984**, *106*, 6647
- <sup>6</sup> Zeng, T.; Song, G.; Moores, A.; Li, C.-J. *Synlett.* **2010**, *13*, 2002
- <sup>7</sup> Nauth, A. M.; Otto, N.; Opatz, T. *Adv. Synth. Catal.* **2015**, *357*, 3424
